# Supplementary material
Source: publisher figshare collection journal article supplement (https://acs.figshare.com/ndownloader/files/4314745)
Supplement: Supplementary file 1 [file 4314745]

#========================================================================

_journal_name_full                'Crystal Growth & Design'
_journal_year                     ?
_journal_volume                   ?
_journal_issue                    ?
_journal_page_first               ?
_journal_page_last                ?
_journal_suppl_publ_number        ?
_journal_suppl_publ_pages         ?


#========================================================================

# SUBMISSION DETAILS 

_publ_contact_author_name         'Prof. Rong Cao'
_publ_contact_author_address
;
 State Key Laboratory of Structural Chemistry
 Fujian Institute of Research on the Structure of Matter
 Chinese Academy of Sciences
 Fuzhou, Fujian, 350002, China
;

#========================================================================

_publ_contact_author_email        'rcao@fjirsm.ac.cn'
_publ_contact_author_fax          '+86-591-83796710'
_publ_contact_author_phone        '+86-591-83796710'
_publ_contact_letter
;

 Dear Sir,
 Please consider this CIF submission for publication in 
 Crystal Growth & Design. 
 All authors have seen and approved this submission.

 Best wishes

 Rong Cao
;

#========================================================================  
 
data_0628 
 
_audit_creation_method            SHELXL-97 
_chemical_name_systematic 
; 
 ? 
; 
_chemical_name_common             ? 
_chemical_melting_point           ? 
_chemical_formula_moiety          ? 
_chemical_formula_sum 
 'C52 H48 Cd2 N8 O19' 
_chemical_formula_weight          1313.80 
 
loop_ 
 _atom_type_symbol 
 _atom_type_description 
 _atom_type_scat_dispersion_real 
 _atom_type_scat_dispersion_imag 
 _atom_type_scat_source 
 'C'  'C'   0.0033   0.0016 
 'International Tables Vol C Tables 4.2.6.8 and 6.1.1.4' 
 'Cd'  'Cd'  -0.8075   1.2024 
 'International Tables Vol C Tables 4.2.6.8 and 6.1.1.4' 
 'N'  'N'   0.0061   0.0033 
 'International Tables Vol C Tables 4.2.6.8 and 6.1.1.4' 
 'O'  'O'   0.0106   0.0060 
 'International Tables Vol C Tables 4.2.6.8 and 6.1.1.4' 
 'H'  'H'   0.0000   0.0000 
 'International Tables Vol C Tables 4.2.6.8 and 6.1.1.4' 
 
_symmetry_cell_setting            Monoclinic 
_symmetry_space_group_name_H-M    P21/c 
 
loop_ 
 _symmetry_equiv_pos_as_xyz 
 'x, y, z' 
 '-x, y+1/2, -z+1/2' 
 '-x, -y, -z' 
 'x, -y-1/2, z-1/2' 
 
_cell_length_a                    12.29390(10) 
_cell_length_b                    16.2197(2) 
_cell_length_c                    13.8075(2) 
_cell_angle_alpha                 90.00 
_cell_angle_beta                  95.7030(10) 
_cell_angle_gamma                 90.00 
_cell_volume                      2739.63(6) 
_cell_formula_units_Z             2 
_cell_measurement_temperature     293(2) 
_cell_measurement_reflns_used     11279 
_cell_measurement_theta_min       2.3319 
_cell_measurement_theta_max       28.8656
 
_exptl_crystal_description        'Prism'  
_exptl_crystal_colour             'colorless' 
_exptl_crystal_size_max           0.20 
_exptl_crystal_size_mid           0.20
_exptl_crystal_size_min           0.15
_exptl_crystal_density_meas       ? 
_exptl_crystal_density_diffrn     1.593 
_exptl_crystal_density_method     'not measured' 
_exptl_crystal_F_000              1328 
_exptl_absorpt_coefficient_mu     0.859 
_exptl_absorpt_correction_type    'Multi-scan' 
_exptl_absorpt_correction_T_min   0.90772 
_exptl_absorpt_correction_T_max   1.00000
_exptl_absorpt_process_details    'SADABS (Sheldrick, 1996)' 
 
_exptl_special_details 
; 
 ? 
; 
 
_diffrn_ambient_temperature       293(2) 
_diffrn_radiation_wavelength      0.71073 
_diffrn_radiation_type            MoK\a 
_diffrn_radiation_source          'fine-focus sealed tube' 
_diffrn_radiation_monochromator   graphite 
_diffrn_measurement_device_type   'Bruker P4' 
_diffrn_measurement_method        '\w scans' 
_diffrn_detector_area_resol_mean  ? 
_diffrn_standards_number          ? 
_diffrn_standards_interval_count  ? 
_diffrn_standards_interval_time   ? 
_diffrn_standards_decay_%         ? 
_diffrn_reflns_number             16386 
_diffrn_reflns_av_R_equivalents   0.0210 
_diffrn_reflns_av_sigmaI/netI     0.0236 
_diffrn_reflns_limit_h_min        -14 
_diffrn_reflns_limit_h_max        14 
_diffrn_reflns_limit_k_min        -19 
_diffrn_reflns_limit_k_max        19 
_diffrn_reflns_limit_l_min        -16 
_diffrn_reflns_limit_l_max        14 
_diffrn_reflns_theta_min          2.46 
_diffrn_reflns_theta_max          25.01 
_reflns_number_total              4825 
_reflns_number_gt                 4055 
_reflns_threshold_expression      >2sigma(I) 
 
_computing_data_collection        'SMART (Siemens, 1996)' 
_computing_cell_refinement        'SAINT (Siemens, 1996)' 
_computing_data_reduction         'SAINT (Siemens, 1996)' 
_computing_structure_solution     'SHELXS97 (Sheldrick, 2008)' 
_computing_structure_refinement   'SHELXL97 (Sheldrick, 2008)' 
_computing_molecular_graphics     'SHELXTL (Sheldrick, 1997)' 
_computing_publication_material   'SHELXTL (Sheldrick, 1997)' 
 
_refine_special_details 
; 
 Refinement of F^2^ against ALL reflections.  The weighted R-factor wR and 
 goodness of fit S are based on F^2^, conventional R-factors R are based 
 on F, with F set to zero for negative F^2^. The threshold expression of 
 F^2^ > 2sigma(F^2^) is used only for calculating R-factors(gt) etc. and is 
 not relevant to the choice of reflections for refinement.  R-factors based 
 on F^2^ are statistically about twice as large as those based on F, and R- 
 factors based on ALL data will be even larger. 
; 
 
_refine_ls_structure_factor_coef  Fsqd  
_refine_ls_matrix_type            full 
_refine_ls_weighting_scheme       calc  
_refine_ls_weighting_details 
 'calc w=1/[\s^2^(Fo^2^)+(0.0576P)^2^+0.0000P] where P=(Fo^2^+2Fc^2^)/3' 
_atom_sites_solution_primary      direct 
_atom_sites_solution_secondary    difmap 
_atom_sites_solution_hydrogens    geom 
_refine_ls_hydrogen_treatment     none 
_refine_ls_extinction_method      none 
_refine_ls_extinction_coef        ? 
_refine_ls_number_reflns          4825 
_refine_ls_number_parameters      370 
_refine_ls_number_restraints      0 
_refine_ls_R_factor_all           0.0317 
_refine_ls_R_factor_gt            0.0250 
_refine_ls_wR_factor_ref          0.0830 
_refine_ls_wR_factor_gt           0.0811 
_refine_ls_goodness_of_fit_ref    1.039 
_refine_ls_restrained_S_all       1.039 
_refine_ls_shift/su_max           0.138 
_refine_ls_shift/su_mean          0.005 
 
loop_ 
 _atom_site_label 
 _atom_site_type_symbol 
 _atom_site_fract_x 
 _atom_site_fract_y 
 _atom_site_fract_z 
 _atom_site_U_iso_or_equiv 
 _atom_site_adp_type 
 _atom_site_occupancy 
 _atom_site_symmetry_multiplicity 
 _atom_site_calc_flag 
 _atom_site_refinement_flags 
 _atom_site_disorder_assembly 
 _atom_site_disorder_group 
Cd1 Cd 0.968076(15) 0.456208(11) 0.621936(13) 0.02549(9) Uani 1 1 d . . . 
O1 O 0.42553(18) 1.16384(13) 0.67227(18) 0.0554(7) Uani 1 1 d . . . 
O2 O 0.50570(17) 0.73523(13) 0.54284(19) 0.0546(6) Uani 1 1 d . . . 
O3 O 1.09546(16) 0.55201(12) 0.54675(14) 0.0352(5) Uani 1 1 d . . . 
O5 O 0.82548(17) 0.37430(12) 0.65711(14) 0.0382(5) Uani 1 1 d . . . 
O6 O 0.94114(18) 0.37960(14) 0.78845(15) 0.0475(6) Uani 1 1 d . . . 
O4 O 1.11809(17) 0.52764(12) 0.70270(14) 0.0358(5) Uani 1 1 d . . . 
N1 N 0.85689(19) 0.56834(14) 0.63973(17) 0.0299(5) Uani 1 1 d . . . 
N2 N 0.66211(18) 0.78025(13) 0.62723(16) 0.0316(5) Uani 1 1 d . . . 
H2 H 0.6942 0.8236 0.6520 0.038 Uiso 1 1 calc R . . 
N3 N 0.07954(19) 1.34335(14) 0.60061(16) 0.0301(5) Uani 1 1 d . . . 
N4 N 0.26011(18) 1.12429(14) 0.59998(17) 0.0353(6) Uani 1 1 d . . . 
H4 H 0.2238 1.0824 0.5761 0.042 Uiso 1 1 calc R . . 
C1 C 0.7488(2) 0.56346(18) 0.6163(2) 0.0389(7) Uani 1 1 d . . . 
H1 H 0.7186 0.5118 0.6021 0.047 Uiso 1 1 calc R . . 
C2 C 0.6800(2) 0.63035(17) 0.6121(2) 0.0392(7) Uani 1 1 d . . . 
H2A H 0.6052 0.6234 0.5968 0.047 Uiso 1 1 calc R . . 
C3 C 0.7232(2) 0.70801(16) 0.63090(19) 0.0274(6) Uani 1 1 d . . . 
C5 C 0.8964(2) 0.64269(17) 0.6618(2) 0.0330(6) Uani 1 1 d . . . 
H5 H 0.9708 0.6474 0.6808 0.040 Uiso 1 1 calc R . . 
C16 C 0.0332(2) 1.26961(17) 0.5858(2) 0.0337(7) Uani 1 1 d . . . 
H16 H -0.0427 1.2671 0.5763 0.040 Uiso 1 1 calc R . . 
C15 C 0.0902(2) 1.19750(17) 0.5836(2) 0.0357(7) Uani 1 1 d . . . 
H15 H 0.0536 1.1478 0.5721 0.043 Uiso 1 1 calc R . . 
C14 C 0.2050(2) 1.19942(16) 0.59918(19) 0.0285(6) Uani 1 1 d . . . 
C18 C 0.2537(2) 1.27536(17) 0.6117(2) 0.0315(6) Uani 1 1 d . . . 
H18 H 0.3295 1.2800 0.6199 0.038 Uiso 1 1 calc R . . 
C17 C 0.1889(2) 1.34444(17) 0.6121(2) 0.0337(7) Uani 1 1 d . . . 
H17 H 0.2234 1.3953 0.6210 0.040 Uiso 1 1 calc R . . 
C4 C 0.8349(2) 0.71282(17) 0.6586(2) 0.0325(6) Uani 1 1 d . . . 
H4A H 0.8673 0.7634 0.6749 0.039 Uiso 1 1 calc R . . 
C6 C 0.5556(2) 0.78938(17) 0.5879(2) 0.0328(6) Uani 1 1 d . . . 
C7 C 0.5055(2) 0.87133(16) 0.6037(2) 0.0298(6) Uani 1 1 d . . . 
C8 C 0.4222(2) 0.89851(17) 0.5346(2) 0.0336(7) Uani 1 1 d . . . 
H8 H 0.3993 0.8652 0.4816 0.040 Uiso 1 1 calc R . . 
C12 C 0.5359(2) 0.92015(18) 0.6841(2) 0.0363(7) Uani 1 1 d . . . 
H12 H 0.5892 0.9017 0.7317 0.044 Uiso 1 1 calc R . . 
C13 C 0.3669(2) 1.11088(18) 0.6352(2) 0.0331(6) Uani 1 1 d . . . 
C10 C 0.4070(2) 1.02407(17) 0.6244(2) 0.0309(6) Uani 1 1 d . . . 
C11 C 0.4874(2) 0.99611(18) 0.6942(2) 0.0355(7) Uani 1 1 d . . . 
H11 H 0.5090 1.0287 0.7481 0.043 Uiso 1 1 calc R . . 
C9 C 0.3739(2) 0.97450(18) 0.5445(2) 0.0340(7) Uani 1 1 d . . . 
H9 H 0.3194 0.9926 0.4978 0.041 Uiso 1 1 calc R . . 
C26 C 1.1432(2) 0.85099(16) 0.7575(2) 0.0306(6) Uani 1 1 d . . . 
C22 C 1.2104(2) 0.78467(17) 0.71475(19) 0.0310(6) Uani 1 1 d . . . 
H22 H 1.2847 0.8063 0.7131 0.037 Uiso 1 1 calc R . . 
C23 C 1.2181(3) 0.70855(17) 0.7805(2) 0.0367(7) Uani 1 1 d . . . 
H23A H 1.2482 0.7244 0.8454 0.044 Uiso 1 1 calc R . . 
H23B H 1.1452 0.6868 0.7850 0.044 Uiso 1 1 calc R . . 
C21 C 1.1685(2) 0.76047(18) 0.61122(19) 0.0350(7) Uani 1 1 d . . . 
H21A H 1.0939 0.7407 0.6101 0.042 Uiso 1 1 calc R . . 
H21B H 1.1682 0.8086 0.5695 0.042 Uiso 1 1 calc R . . 
C24 C 1.2890(2) 0.64184(18) 0.7426(2) 0.0442(8) Uani 1 1 d . . . 
H24A H 1.2879 0.5937 0.7842 0.053 Uiso 1 1 calc R . . 
H24B H 1.3638 0.6614 0.7454 0.053 Uiso 1 1 calc R . . 
C25 C 1.1482(2) 0.56325(16) 0.6295(2) 0.0279(6) Uani 1 1 d . . . 
C19 C 1.2497(2) 0.61709(19) 0.6369(2) 0.0376(7) Uani 1 1 d . . . 
H19 H 1.3081 0.5834 0.6139 0.045 Uiso 1 1 calc R . . 
C20 C 1.2394(2) 0.69332(19) 0.5720(2) 0.0393(7) Uani 1 1 d . . . 
H20A H 1.3118 0.7155 0.5661 0.047 Uiso 1 1 calc R . . 
H20B H 1.2080 0.6774 0.5075 0.047 Uiso 1 1 calc R . . 
O7 O 0.8215(2) 0.92438(16) 0.64271(18) 0.0631(7) Uani 1 1 d . . . 
O8 O 0.0998(2) 0.98852(18) 0.5606(2) 0.0807(9) Uani 1 1 d . . . 
O9 O 0.5891(3) 0.3785(2) 0.5979(2) 0.0932(10) Uani 1 1 d . . . 
O10 O 0.4458(6) 0.4957(4) 0.5665(5) 0.098(2) Uani 0.50 1 d P . . 
 
loop_ 
 _atom_site_aniso_label 
 _atom_site_aniso_U_11 
 _atom_site_aniso_U_22 
 _atom_site_aniso_U_33 
 _atom_site_aniso_U_23 
 _atom_site_aniso_U_13 
 _atom_site_aniso_U_12 
Cd1 0.02654(13) 0.01806(12) 0.03151(13) -0.00020(8) 0.00110(8) 0.00672(8) 
O1 0.0385(13) 0.0307(12) 0.0924(18) -0.0138(12) -0.0162(12) 0.0095(10) 
O2 0.0346(12) 0.0304(12) 0.0939(18) -0.0168(12) -0.0173(12) 0.0088(10) 
O3 0.0339(11) 0.0385(12) 0.0321(11) -0.0049(9) -0.0031(9) -0.0036(9) 
O5 0.0482(13) 0.0312(11) 0.0356(11) 0.0085(9) 0.0060(9) 0.0005(10) 
O6 0.0473(13) 0.0456(13) 0.0489(13) 0.0005(10) 0.0007(10) -0.0125(11) 
O4 0.0399(12) 0.0328(11) 0.0330(11) 0.0043(9) -0.0052(9) 0.0012(9) 
N1 0.0275(12) 0.0211(11) 0.0411(13) -0.0006(10) 0.0035(10) 0.0071(10) 
N2 0.0257(12) 0.0200(12) 0.0479(14) -0.0053(10) -0.0019(10) 0.0059(10) 
N3 0.0316(13) 0.0254(12) 0.0331(12) -0.0012(10) 0.0018(10) 0.0100(10) 
N4 0.0273(13) 0.0224(12) 0.0548(15) -0.0081(11) -0.0029(11) 0.0087(10) 
C1 0.0320(16) 0.0199(14) 0.064(2) 0.0009(14) 0.0026(15) 0.0028(12) 
C2 0.0237(14) 0.0238(15) 0.069(2) -0.0014(14) 0.0009(14) 0.0023(12) 
C3 0.0266(14) 0.0236(14) 0.0322(14) -0.0002(11) 0.0031(11) 0.0082(12) 
C5 0.0242(14) 0.0284(16) 0.0455(17) -0.0045(13) -0.0018(12) 0.0057(12) 
C16 0.0254(14) 0.0302(15) 0.0442(16) -0.0036(13) -0.0029(12) 0.0095(12) 
C15 0.0298(15) 0.0247(15) 0.0507(17) -0.0100(13) -0.0053(13) 0.0065(13) 
C14 0.0289(14) 0.0251(15) 0.0311(14) -0.0008(11) 0.0017(11) 0.0106(12) 
C18 0.0264(14) 0.0261(15) 0.0425(16) -0.0003(12) 0.0051(12) 0.0054(12) 
C17 0.0349(16) 0.0236(15) 0.0427(16) -0.0002(12) 0.0040(13) 0.0025(12) 
C4 0.0285(15) 0.0218(14) 0.0464(17) -0.0073(12) -0.0006(13) 0.0016(12) 
C6 0.0274(14) 0.0239(14) 0.0467(17) -0.0012(13) 0.0018(13) 0.0061(12) 
C7 0.0235(13) 0.0226(14) 0.0438(16) 0.0033(12) 0.0064(12) 0.0070(12) 
C8 0.0275(15) 0.0299(15) 0.0423(16) -0.0061(13) -0.0017(12) 0.0067(12) 
C12 0.0322(16) 0.0338(16) 0.0416(17) -0.0002(13) -0.0030(13) 0.0123(14) 
C13 0.0281(15) 0.0260(15) 0.0449(17) 0.0004(13) 0.0021(13) 0.0080(12) 
C10 0.0243(15) 0.0259(15) 0.0434(17) -0.0005(12) 0.0071(12) 0.0081(12) 
C11 0.0341(16) 0.0312(16) 0.0406(16) -0.0057(13) 0.0005(13) 0.0105(13) 
C9 0.0263(15) 0.0333(16) 0.0411(16) 0.0022(13) -0.0025(12) 0.0116(13) 
C26 0.0369(16) 0.0196(14) 0.0361(15) 0.0015(12) 0.0078(13) -0.0044(12) 
C22 0.0295(14) 0.0286(15) 0.0345(15) -0.0068(12) 0.0023(12) -0.0042(12) 
C23 0.0451(18) 0.0311(16) 0.0312(15) -0.0051(12) -0.0093(13) 0.0031(14) 
C21 0.0438(17) 0.0299(16) 0.0312(15) -0.0016(12) 0.0038(13) -0.0043(14) 
C24 0.0375(17) 0.0352(17) 0.0553(19) -0.0116(15) -0.0177(15) 0.0056(14) 
C25 0.0251(14) 0.0184(13) 0.0393(16) -0.0077(12) -0.0017(12) 0.0103(11) 
C19 0.0229(14) 0.0381(17) 0.0506(18) -0.0177(14) -0.0012(13) 0.0032(13) 
C20 0.0364(16) 0.0398(18) 0.0437(17) -0.0111(14) 0.0142(13) -0.0106(14) 
O7 0.0641(17) 0.0595(16) 0.0618(16) -0.0199(13) -0.0126(13) -0.0037(14) 
O8 0.0680(19) 0.0641(18) 0.105(2) 0.0300(17) -0.0169(17) -0.0144(16) 
O9 0.090(2) 0.095(2) 0.092(2) -0.0375(19) -0.0055(17) -0.001(2) 
O10 0.093(5) 0.099(5) 0.096(5) -0.035(4) -0.024(4) 0.036(4) 
 
_geom_special_details 
; 
 All esds (except the esd in the dihedral angle between two l.s. planes) 
 are estimated using the full covariance matrix.  The cell esds are taken 
 into account individually in the estimation of esds in distances, angles 
 and torsion angles; correlations between esds in cell parameters are only 
 used when they are defined by crystal symmetry.  An approximate (isotropic) 
 treatment of cell esds is used for estimating esds involving l.s. planes. 
; 
 
loop_ 
 _geom_bond_atom_site_label_1 
 _geom_bond_atom_site_label_2 
 _geom_bond_distance 
 _geom_bond_site_symmetry_2 
 _geom_bond_publ_flag 
Cd1 O5 2.290(2) . ? 
Cd1 N1 2.303(2) . ? 
Cd1 N3 2.323(2) 1_645 ? 
Cd1 O4 2.3619(19) . ? 
Cd1 O3 2.3856(19) 3_766 ? 
Cd1 O3 2.504(2) . ? 
Cd1 O6 2.663(2) . ? 
Cd1 C26 2.830(3) 2_746 ? 
Cd1 Cd1 3.8076(4) 3_766 ? 
O1 C13 1.202(4) . ? 
O2 C6 1.208(3) . ? 
O3 C25 1.269(3) . ? 
O3 Cd1 2.3856(19) 3_766 ? 
O5 C26 1.261(3) 2_746 ? 
O6 C26 1.250(3) 2_746 ? 
O4 C25 1.252(4) . ? 
N1 C5 1.324(3) . ? 
N1 C1 1.338(4) . ? 
N2 C6 1.375(3) . ? 
N2 C3 1.390(3) . ? 
N2 H2 0.8600 . ? 
N3 C16 1.332(3) . ? 
N3 C17 1.339(4) . ? 
N3 Cd1 2.323(2) 1_465 ? 
N4 C13 1.371(3) . ? 
N4 C14 1.394(3) . ? 
N4 H4 0.8600 . ? 
C1 C2 1.374(4) . ? 
C1 H1 0.9300 . ? 
C2 C3 1.381(4) . ? 
C2 H2A 0.9300 . ? 
C3 C4 1.390(4) . ? 
C5 C4 1.364(4) . ? 
C5 H5 0.9300 . ? 
C16 C15 1.365(4) . ? 
C16 H16 0.9300 . ? 
C15 C14 1.406(4) . ? 
C15 H15 0.9300 . ? 
C14 C18 1.373(4) . ? 
C18 C17 1.375(4) . ? 
C18 H18 0.9300 . ? 
C17 H17 0.9300 . ? 
C4 H4A 0.9300 . ? 
C6 C7 1.490(4) . ? 
C7 C12 1.384(4) . ? 
C7 C8 1.400(4) . ? 
C8 C9 1.381(4) . ? 
C8 H8 0.9300 . ? 
C12 C11 1.381(4) . ? 
C12 H12 0.9300 . ? 
C13 C10 1.504(4) . ? 
C10 C11 1.386(4) . ? 
C10 C9 1.393(4) . ? 
C11 H11 0.9300 . ? 
C9 H9 0.9300 . ? 
C26 O5 1.261(3) 2_756 ? 
C26 O6 1.250(3) 2_756 ? 
C26 C22 1.512(4) . ? 
C26 Cd1 2.830(3) 2_756 ? 
C22 C21 1.522(4) . ? 
C22 C23 1.530(4) . ? 
C22 H22 0.9800 . ? 
C23 C24 1.515(4) . ? 
C23 H23A 0.9700 . ? 
C23 H23B 0.9700 . ? 
C21 C20 1.527(4) . ? 
C21 H21A 0.9700 . ? 
C21 H21B 0.9700 . ? 
C24 C19 1.543(4) . ? 
C24 H24A 0.9700 . ? 
C24 H24B 0.9700 . ? 
C25 C19 1.518(4) . ? 
C19 C20 1.525(4) . ? 
C19 H19 0.9800 . ? 
C20 H20A 0.9700 . ? 
C20 H20B 0.9700 . ? 
 
loop_ 
 _geom_angle_atom_site_label_1 
 _geom_angle_atom_site_label_2 
 _geom_angle_atom_site_label_3 
 _geom_angle 
 _geom_angle_site_symmetry_1 
 _geom_angle_site_symmetry_3 
 _geom_angle_publ_flag 
O5 Cd1 N1 87.74(8) . . ? 
O5 Cd1 N3 92.49(8) . 1_645 ? 
N1 Cd1 N3 178.85(8) . 1_645 ? 
O5 Cd1 O4 139.71(7) . . ? 
N1 Cd1 O4 90.35(8) . . ? 
N3 Cd1 O4 90.21(8) 1_645 . ? 
O5 Cd1 O3 89.51(7) . 3_766 ? 
N1 Cd1 O3 90.46(8) . 3_766 ? 
N3 Cd1 O3 88.41(7) 1_645 3_766 ? 
O4 Cd1 O3 130.76(7) . 3_766 ? 
O5 Cd1 O3 166.33(7) . . ? 
N1 Cd1 O3 87.50(7) . . ? 
N3 Cd1 O3 92.03(7) 1_645 . ? 
O4 Cd1 O3 53.14(6) . . ? 
O3 Cd1 O3 77.73(7) 3_766 . ? 
O5 Cd1 O6 51.87(7) . . ? 
N1 Cd1 O6 98.65(8) . . ? 
N3 Cd1 O6 82.37(7) 1_645 . ? 
O4 Cd1 O6 88.83(7) . . ? 
O3 Cd1 O6 139.47(7) 3_766 . ? 
O3 Cd1 O6 141.65(6) . . ? 
O5 Cd1 C26 25.88(7) . 2_746 ? 
N1 Cd1 C26 94.98(8) . 2_746 ? 
N3 Cd1 C26 85.70(8) 1_645 2_746 ? 
O4 Cd1 C26 114.74(7) . 2_746 ? 
O3 Cd1 C26 114.21(8) 3_766 2_746 ? 
O3 Cd1 C26 167.72(7) . 2_746 ? 
O6 Cd1 C26 26.08(7) . 2_746 ? 
O5 Cd1 Cd1 129.31(5) . 3_766 ? 
N1 Cd1 Cd1 88.65(6) . 3_766 ? 
N3 Cd1 Cd1 90.34(6) 1_645 3_766 ? 
O4 Cd1 Cd1 90.84(5) . 3_766 ? 
O3 Cd1 Cd1 39.98(5) 3_766 3_766 ? 
O3 Cd1 Cd1 37.75(4) . 3_766 ? 
O6 Cd1 Cd1 172.70(5) . 3_766 ? 
C26 Cd1 Cd1 154.08(6) 2_746 3_766 ? 
C25 O3 Cd1 167.17(19) . 3_766 ? 
C25 O3 Cd1 90.03(17) . . ? 
Cd1 O3 Cd1 102.27(7) 3_766 . ? 
C26 O5 Cd1 101.71(17) 2_746 . ? 
C26 O6 Cd1 84.43(17) 2_746 . ? 
C25 O4 Cd1 97.16(16) . . ? 
C5 N1 C1 116.2(2) . . ? 
C5 N1 Cd1 122.41(18) . . ? 
C1 N1 Cd1 120.87(19) . . ? 
C6 N2 C3 126.5(2) . . ? 
C6 N2 H2 116.7 . . ? 
C3 N2 H2 116.7 . . ? 
C16 N3 C17 116.1(2) . . ? 
C16 N3 Cd1 118.58(17) . 1_465 ? 
C17 N3 Cd1 124.95(18) . 1_465 ? 
C13 N4 C14 126.1(2) . . ? 
C13 N4 H4 117.0 . . ? 
C14 N4 H4 117.0 . . ? 
N1 C1 C2 123.8(3) . . ? 
N1 C1 H1 118.1 . . ? 
C2 C1 H1 118.1 . . ? 
C1 C2 C3 119.3(3) . . ? 
C1 C2 H2A 120.4 . . ? 
C3 C2 H2A 120.4 . . ? 
C2 C3 C4 117.0(2) . . ? 
C2 C3 N2 124.5(2) . . ? 
C4 C3 N2 118.6(2) . . ? 
N1 C5 C4 124.2(2) . . ? 
N1 C5 H5 117.9 . . ? 
C4 C5 H5 117.9 . . ? 
N3 C16 C15 124.0(2) . . ? 
N3 C16 H16 118.0 . . ? 
C15 C16 H16 118.0 . . ? 
C16 C15 C14 119.2(3) . . ? 
C16 C15 H15 120.4 . . ? 
C14 C15 H15 120.4 . . ? 
C18 C14 N4 125.3(2) . . ? 
C18 C14 C15 117.2(2) . . ? 
N4 C14 C15 117.5(2) . . ? 
C17 C18 C14 119.1(2) . . ? 
C17 C18 H18 120.5 . . ? 
C14 C18 H18 120.5 . . ? 
N3 C17 C18 124.3(3) . . ? 
N3 C17 H17 117.8 . . ? 
C18 C17 H17 117.8 . . ? 
C5 C4 C3 119.4(2) . . ? 
C5 C4 H4A 120.3 . . ? 
C3 C4 H4A 120.3 . . ? 
O2 C6 N2 122.7(2) . . ? 
O2 C6 C7 121.9(2) . . ? 
N2 C6 C7 115.4(2) . . ? 
C12 C7 C8 119.2(3) . . ? 
C12 C7 C6 123.0(2) . . ? 
C8 C7 C6 117.7(2) . . ? 
C9 C8 C7 120.4(3) . . ? 
C9 C8 H8 119.8 . . ? 
C7 C8 H8 119.8 . . ? 
C11 C12 C7 120.4(2) . . ? 
C11 C12 H12 119.8 . . ? 
C7 C12 H12 119.8 . . ? 
O1 C13 N4 123.4(3) . . ? 
O1 C13 C10 121.5(3) . . ? 
N4 C13 C10 115.1(2) . . ? 
C11 C10 C9 119.6(3) . . ? 
C11 C10 C13 117.1(3) . . ? 
C9 C10 C13 123.1(2) . . ? 
C12 C11 C10 120.5(3) . . ? 
C12 C11 H11 119.8 . . ? 
C10 C11 H11 119.8 . . ? 
C8 C9 C10 120.0(2) . . ? 
C8 C9 H9 120.0 . . ? 
C10 C9 H9 120.0 . . ? 
O5 C26 O6 121.6(3) 2_756 2_756 ? 
O5 C26 C22 116.7(2) 2_756 . ? 
O6 C26 C22 121.6(2) 2_756 . ? 
O5 C26 Cd1 52.41(14) 2_756 2_756 ? 
O6 C26 Cd1 69.49(16) 2_756 2_756 ? 
C22 C26 Cd1 166.86(19) . 2_756 ? 
C26 C22 C21 113.8(2) . . ? 
C26 C22 C23 110.3(2) . . ? 
C21 C22 C23 110.1(2) . . ? 
C26 C22 H22 107.5 . . ? 
C21 C22 H22 107.5 . . ? 
C23 C22 H22 107.5 . . ? 
C24 C23 C22 112.0(3) . . ? 
C24 C23 H23A 109.2 . . ? 
C22 C23 H23A 109.2 . . ? 
C24 C23 H23B 109.2 . . ? 
C22 C23 H23B 109.2 . . ? 
H23A C23 H23B 107.9 . . ? 
C20 C21 C22 111.4(2) . . ? 
C20 C21 H21A 109.4 . . ? 
C22 C21 H21A 109.3 . . ? 
C20 C21 H21B 109.3 . . ? 
C22 C21 H21B 109.4 . . ? 
H21A C21 H21B 108.0 . . ? 
C23 C24 C19 112.1(2) . . ? 
C23 C24 H24A 109.2 . . ? 
C19 C24 H24A 109.2 . . ? 
C23 C24 H24B 109.2 . . ? 
C19 C24 H24B 109.2 . . ? 
H24A C24 H24B 107.9 . . ? 
O4 C25 O3 119.7(3) . . ? 
O4 C25 C19 121.2(2) . . ? 
O3 C25 C19 119.1(3) . . ? 
C25 C19 C20 114.0(2) . . ? 
C25 C19 C24 113.0(3) . . ? 
C20 C19 C24 110.2(2) . . ? 
C25 C19 H19 106.3 . . ? 
C20 C19 H19 106.3 . . ? 
C24 C19 H19 106.3 . . ? 
C21 C20 C19 112.7(2) . . ? 
C21 C20 H20A 109.0 . . ? 
C19 C20 H20A 109.0 . . ? 
C21 C20 H20B 109.0 . . ? 
C19 C20 H20B 109.0 . . ? 
H20A C20 H20B 107.8 . . ? 
 
_diffrn_measured_fraction_theta_max    0.999 
_diffrn_reflns_theta_full              25.01 
_diffrn_measured_fraction_theta_full   0.999 
_refine_diff_density_max    0.726 
_refine_diff_density_min   -0.261 
_refine_diff_density_rms    0.079 

#===END
 
data_082901 
 
_audit_creation_method            SHELXL-97 
_chemical_name_systematic 
; 
 ? 
; 
_chemical_name_common             ? 
_chemical_melting_point           ? 
_chemical_formula_moiety          ? 
_chemical_formula_sum 
 'C26 H24 Cd N4 O6' 
_chemical_formula_weight          600.89 
 
loop_ 
 _atom_type_symbol 
 _atom_type_description 
 _atom_type_scat_dispersion_real 
 _atom_type_scat_dispersion_imag 
 _atom_type_scat_source 
 'C'  'C'   0.0033   0.0016 
 'International Tables Vol C Tables 4.2.6.8 and 6.1.1.4' 
 'H'  'H'   0.0000   0.0000 
 'International Tables Vol C Tables 4.2.6.8 and 6.1.1.4' 
 'N'  'N'   0.0061   0.0033 
 'International Tables Vol C Tables 4.2.6.8 and 6.1.1.4' 
 'O'  'O'   0.0106   0.0060 
 'International Tables Vol C Tables 4.2.6.8 and 6.1.1.4' 
 'Cd'  'Cd'  -0.8075   1.2024 
 'International Tables Vol C Tables 4.2.6.8 and 6.1.1.4' 
 
_symmetry_cell_setting            Monoclinic  
_symmetry_space_group_name_H-M    'P2(1)/n'  
 
loop_ 
 _symmetry_equiv_pos_as_xyz 
 'x, y, z' 
 '-x+1/2, y+1/2, -z+1/2' 
 '-x, -y, -z' 
 'x-1/2, -y-1/2, z-1/2' 
 
_cell_length_a                    16.2998(5) 
_cell_length_b                    9.1813(2) 
_cell_length_c                    18.2724(6) 
_cell_angle_alpha                 90.00 
_cell_angle_beta                  113.500(4) 
_cell_angle_gamma                 90.00 
_cell_volume                      2507.72(13) 
_cell_formula_units_Z             4 
_cell_measurement_temperature     293(2) 
_cell_measurement_reflns_used     5292 
_cell_measurement_theta_min       2.4260 
_cell_measurement_theta_max       28.7005 
 
_exptl_crystal_description        block 
_exptl_crystal_colour             colorless
_exptl_crystal_size_max           0.4
_exptl_crystal_size_mid           0.3
_exptl_crystal_size_min           0.2
_exptl_crystal_density_meas       ? 
_exptl_crystal_density_diffrn     1.592 
_exptl_crystal_density_method     'not measured' 
_exptl_crystal_F_000              1216 
_exptl_absorpt_coefficient_mu     0.920 
_exptl_absorpt_correction_type    'Multi-Scan' 
_exptl_absorpt_correction_T_min   0.94392 
_exptl_absorpt_correction_T_max   1.00000
_exptl_absorpt_process_details    'SADABS (Sheldrick, 1996)' 
 
_exptl_special_details 
; 
 ? 
; 
 
_diffrn_ambient_temperature       293(2) 
_diffrn_radiation_wavelength      0.71073 
_diffrn_radiation_type            MoK\a 
_diffrn_radiation_source          'fine-focus sealed tube' 
_diffrn_radiation_monochromator   graphite 
_diffrn_measurement_device_type   'Bruker P4' 
_diffrn_measurement_method        '\w scans' 
_diffrn_detector_area_resol_mean  ? 
_diffrn_standards_number          ? 
_diffrn_standards_interval_count  ? 
_diffrn_standards_interval_time   ? 
_diffrn_standards_decay_%         ? 
_diffrn_reflns_number             10519 
_diffrn_reflns_av_R_equivalents   0.0295 
_diffrn_reflns_av_sigmaI/netI     0.0434 
_diffrn_reflns_limit_h_min        -19 
_diffrn_reflns_limit_h_max        19 
_diffrn_reflns_limit_k_min        -10 
_diffrn_reflns_limit_k_max        10 
_diffrn_reflns_limit_l_min        -21 
_diffrn_reflns_limit_l_max        18 
_diffrn_reflns_theta_min          2.43 
_diffrn_reflns_theta_max          25.01 
_reflns_number_total              4422 
_reflns_number_gt                 3078 
_reflns_threshold_expression      >2sigma(I) 
 
_computing_data_collection        'SMART (Siemens, 1996)' 
_computing_cell_refinement        'SAINT (Siemens, 1996)' 
_computing_data_reduction         'SAINT (Siemens, 1996)'
_computing_structure_solution     'SHELXS97 (Sheldrick, 2008)' 
_computing_structure_refinement   'SHELXL97 (Sheldrick, 2008)'
_computing_molecular_graphics     'SHELXTL (Sheldrick, 1997)'
_computing_publication_material   'SHELXTL (Sheldrick, 1997)' 
 
_refine_special_details 
; 
 Refinement of F^2^ against ALL reflections.  The weighted R-factor wR and 
 goodness of fit S are based on F^2^, conventional R-factors R are based 
 on F, with F set to zero for negative F^2^. The threshold expression of 
 F^2^ > 2sigma(F^2^) is used only for calculating R-factors(gt) etc. and is 
 not relevant to the choice of reflections for refinement.  R-factors based 
 on F^2^ are statistically about twice as large as those based on F, and R- 
 factors based on ALL data will be even larger. 
; 
 
_refine_ls_structure_factor_coef  Fsqd  
_refine_ls_matrix_type            full 
_refine_ls_weighting_scheme       calc  
_refine_ls_weighting_details 
 'calc w=1/[\s^2^(Fo^2^)+(0.0525P)^2^+0.0000P] where P=(Fo^2^+2Fc^2^)/3' 
_atom_sites_solution_primary      direct 
_atom_sites_solution_secondary    difmap 
_atom_sites_solution_hydrogens    geom 
_refine_ls_hydrogen_treatment     none
_refine_ls_extinction_method      none 
_refine_ls_extinction_coef        ? 
_refine_ls_number_reflns          4422 
_refine_ls_number_parameters      334 
_refine_ls_number_restraints      0 
_refine_ls_R_factor_all           0.0567 
_refine_ls_R_factor_gt            0.0332 
_refine_ls_wR_factor_ref          0.0963 
_refine_ls_wR_factor_gt           0.0911 
_refine_ls_goodness_of_fit_ref    1.042 
_refine_ls_restrained_S_all       1.042 
_refine_ls_shift/su_max           0.009 
_refine_ls_shift/su_mean          0.001 
 
loop_ 
 _atom_site_label 
 _atom_site_type_symbol 
 _atom_site_fract_x 
 _atom_site_fract_y 
 _atom_site_fract_z 
 _atom_site_U_iso_or_equiv 
 _atom_site_adp_type 
 _atom_site_occupancy 
 _atom_site_symmetry_multiplicity 
 _atom_site_calc_flag 
 _atom_site_refinement_flags 
 _atom_site_disorder_assembly 
 _atom_site_disorder_group 
Cd1 Cd 0.870449(19) 0.49536(3) 0.142711(17) 0.03088(11) Uani 1 1 d . . . 
O5 O 0.99720(19) 0.3280(3) 0.19536(18) 0.0388(7) Uani 1 1 d . . . 
O4 O 0.93892(18) 0.5886(3) 0.27566(16) 0.0368(7) Uani 1 1 d . . . 
O6 O 0.86157(19) 0.2597(3) 0.17597(18) 0.0408(7) Uani 1 1 d . . . 
C22 C 0.9449(3) 0.2374(4) 0.2037(2) 0.0300(9) Uani 1 1 d . . . 
N1 N 0.5137(2) 0.8730(3) 0.09179(19) 0.0332(8) Uani 1 1 d . . . 
H1 H 0.5220 0.9453 0.1239 0.040 Uiso 1 1 calc R . . 
C6 C 0.3586(2) 0.9576(4) 0.1276(2) 0.0292(9) Uani 1 1 d . . . 
H6 H 0.4092 0.9329 0.1726 0.035 Uiso 1 1 calc R . . 
O2 O 0.23099(19) 1.1544(3) 0.21838(17) 0.0454(8) Uani 1 1 d . . . 
C5 C 0.2864(3) 1.0253(4) 0.1362(2) 0.0317(9) Uani 1 1 d . . . 
N3 N 0.7416(2) 0.6227(3) 0.1239(2) 0.0371(8) Uani 1 1 d . . . 
C1 C 0.3553(3) 0.9268(4) 0.0518(2) 0.0302(9) Uani 1 1 d . . . 
C12 C 0.6699(3) 0.8208(4) 0.1614(2) 0.0315(9) Uani 1 1 d . . . 
H12 H 0.6750 0.8980 0.1959 0.038 Uiso 1 1 calc R . . 
N2 N 0.3424(2) 0.9925(3) 0.2807(2) 0.0333(7) Uani 1 1 d . . . 
H2 H 0.3797 0.9341 0.2735 0.040 Uiso 1 1 calc R . . 
C11 C 0.7421(3) 0.7339(4) 0.1726(2) 0.0352(10) Uani 1 1 d . . . 
H11 H 0.7949 0.7526 0.2165 0.042 Uiso 1 1 calc R . . 
C19 C 0.9746(3) 0.6889(4) 0.2506(3) 0.0347(10) Uani 1 1 d . . . 
C18 C 0.8967(3) 0.5975(4) -0.0867(2) 0.0354(10) Uani 1 1 d . . . 
H18 H 0.9266 0.6706 -0.1014 0.042 Uiso 1 1 calc R . . 
C15 C 0.2833(3) 1.0634(4) 0.2142(2) 0.0311(9) Uani 1 1 d . . . 
N4 N 0.8602(2) 0.4895(3) 0.0154(2) 0.0364(8) Uani 1 1 d . . . 
C7 C 0.4276(3) 0.8461(5) 0.0387(3) 0.0431(11) Uani 1 1 d . . . 
C14 C 0.3070(3) 1.1143(5) 0.3844(3) 0.0467(12) Uani 1 1 d . . . 
H14 H 0.2747 1.1879 0.3500 0.056 Uiso 1 1 calc R . . 
C17 C 0.9012(3) 0.5922(4) -0.0097(3) 0.0397(10) Uani 1 1 d . . . 
H17 H 0.9342 0.6631 0.0263 0.048 Uiso 1 1 calc R . . 
O3 O 0.9628(2) 0.6980(3) 0.17929(19) 0.0466(8) Uani 1 1 d . . . 
C8 C 0.5889(3) 0.7927(4) 0.0979(2) 0.0329(10) Uani 1 1 d . . . 
C23 C 0.9851(3) 0.1036(4) 0.2550(3) 0.0380(10) Uani 1 1 d . . . 
H23 H 1.0259 0.1397 0.3073 0.046 Uiso 1 1 calc R . . 
C13 C 0.3478(2) 1.0056(4) 0.3581(2) 0.0306(8) Uani 1 1 d . . . 
C20 C 1.0305(3) 0.8017(4) 0.3107(3) 0.0486(13) Uani 1 1 d . . . 
H20 H 1.0690 0.7491 0.3588 0.058 Uiso 1 1 calc R . . 
C4 C 0.2126(3) 1.0618(5) 0.0684(3) 0.0511(12) Uani 1 1 d . . . 
H4 H 0.1644 1.1080 0.0736 0.061 Uiso 1 1 calc R . . 
C16 C 0.8154(3) 0.3889(5) -0.0379(3) 0.0487(12) Uani 1 1 d . . . 
H16 H 0.7876 0.3152 -0.0212 0.058 Uiso 1 1 calc R . . 
C9 C 0.5874(3) 0.6811(5) 0.0462(3) 0.0512(13) Uani 1 1 d . . . 
H9 H 0.5355 0.6605 0.0016 0.061 Uiso 1 1 calc R . . 
O1 O 0.4088(2) 0.7594(4) -0.0158(2) 0.0848(14) Uani 1 1 d . . . 
C2 C 0.2786(3) 0.9634(5) -0.0152(3) 0.0434(11) Uani 1 1 d . . . 
H2A H 0.2754 0.9409 -0.0659 0.052 Uiso 1 1 calc R . . 
C24 C 1.0401(3) 0.0136(4) 0.2234(4) 0.0545(13) Uani 1 1 d . . . 
H24A H 1.0828 0.0754 0.2134 0.065 Uiso 1 1 calc R . . 
H24B H 1.0015 -0.0307 0.1732 0.065 Uiso 1 1 calc R . . 
C10 C 0.6641(3) 0.6012(5) 0.0620(3) 0.0547(13) Uani 1 1 d . . . 
H10 H 0.6617 0.5267 0.0267 0.066 Uiso 1 1 calc R . . 
C21 C 1.0908(3) 0.8929(5) 0.2840(4) 0.0692(17) Uani 1 1 d . . . 
H21A H 1.1206 0.8296 0.2598 0.083 Uiso 1 1 calc R . . 
H21B H 1.1364 0.9379 0.3304 0.083 Uiso 1 1 calc R . . 
C3 C 0.2087(3) 1.0314(5) -0.0071(3) 0.0599(14) Uani 1 1 d . . . 
H3 H 0.1584 1.0573 -0.0521 0.072 Uiso 1 1 calc R . . 
C25 C 0.9175(3) 0.0071(4) 0.2694(3) 0.0408(10) Uani 1 1 d . . . 
H25A H 0.8784 0.0660 0.2859 0.049 Uiso 1 1 calc R . . 
H25B H 0.8810 -0.0432 0.2205 0.049 Uiso 1 1 calc R . . 
C26 C 0.9668(4) 0.8980(4) 0.3336(3) 0.0532(14) Uani 1 1 d . . . 
H26A H 0.9237 0.8364 0.3432 0.064 Uiso 1 1 calc R . . 
H26B H 1.0010 0.9495 0.3827 0.064 Uiso 1 1 calc R . . 
 
loop_ 
 _atom_site_aniso_label 
 _atom_site_aniso_U_11 
 _atom_site_aniso_U_22 
 _atom_site_aniso_U_33 
 _atom_site_aniso_U_23 
 _atom_site_aniso_U_13 
 _atom_site_aniso_U_12 
Cd1 0.03852(17) 0.02535(16) 0.03056(17) 0.00484(14) 0.01565(12) 0.00446(15) 
O5 0.0386(17) 0.0280(15) 0.051(2) 0.0039(13) 0.0188(15) -0.0045(14) 
O4 0.0429(17) 0.0265(15) 0.0390(18) 0.0064(13) 0.0142(14) 0.0000(13) 
O6 0.0366(17) 0.0335(15) 0.051(2) 0.0111(13) 0.0156(15) 0.0008(13) 
C22 0.035(2) 0.027(2) 0.025(2) -0.0002(17) 0.0090(19) -0.0013(19) 
N1 0.0342(19) 0.0365(18) 0.029(2) -0.0090(15) 0.0124(15) 0.0025(16) 
C6 0.0215(19) 0.0284(19) 0.032(2) 0.0003(16) 0.0044(17) -0.0031(16) 
O2 0.0426(18) 0.0572(19) 0.041(2) 0.0074(15) 0.0213(15) 0.0192(16) 
C5 0.031(2) 0.034(2) 0.032(2) 0.0021(17) 0.0153(17) 0.0055(18) 
N3 0.038(2) 0.0377(19) 0.038(2) -0.0051(16) 0.0175(17) 0.0045(17) 
C1 0.032(2) 0.028(2) 0.030(2) -0.0022(17) 0.0116(18) -0.0016(18) 
C12 0.035(2) 0.030(2) 0.031(2) -0.0070(18) 0.0148(19) -0.0030(19) 
N2 0.0330(17) 0.0385(18) 0.0317(19) -0.0008(16) 0.0163(14) 0.0083(17) 
C11 0.032(2) 0.036(2) 0.037(3) -0.0029(19) 0.0127(19) -0.0087(19) 
C19 0.034(2) 0.021(2) 0.043(3) 0.0038(19) 0.009(2) 0.0091(18) 
C18 0.046(3) 0.034(2) 0.032(2) 0.0037(19) 0.021(2) -0.006(2) 
C15 0.027(2) 0.033(2) 0.035(3) 0.0028(18) 0.0146(18) 0.0010(19) 
N4 0.0451(19) 0.0331(18) 0.039(2) 0.0054(17) 0.0249(16) 0.0023(18) 
C7 0.037(3) 0.051(3) 0.037(3) -0.010(2) 0.011(2) 0.004(2) 
C14 0.066(3) 0.038(2) 0.041(3) 0.004(2) 0.027(2) 0.015(2) 
C17 0.050(3) 0.034(2) 0.037(3) -0.0007(19) 0.019(2) -0.002(2) 
O3 0.065(2) 0.0343(16) 0.042(2) 0.0023(14) 0.0227(17) -0.0054(15) 
C8 0.037(2) 0.033(2) 0.033(3) -0.0012(18) 0.018(2) 0.0021(19) 
C23 0.037(2) 0.027(2) 0.041(3) 0.0037(19) 0.005(2) -0.0032(19) 
C13 0.0294(18) 0.030(2) 0.035(2) -0.002(2) 0.0154(16) -0.004(2) 
C20 0.051(3) 0.023(2) 0.047(3) 0.0069(19) -0.007(2) 0.002(2) 
C4 0.040(3) 0.069(3) 0.042(3) 0.010(2) 0.014(2) 0.021(2) 
C16 0.070(3) 0.040(2) 0.044(3) 0.002(2) 0.030(3) -0.015(2) 
C9 0.038(3) 0.072(3) 0.034(3) -0.022(2) 0.005(2) 0.013(2) 
O1 0.048(2) 0.118(3) 0.067(3) -0.066(2) 0.0006(19) 0.018(2) 
C2 0.047(3) 0.050(3) 0.029(2) 0.0006(19) 0.011(2) 0.008(2) 
C24 0.037(2) 0.037(3) 0.092(4) 0.017(3) 0.029(3) 0.003(2) 
C10 0.050(3) 0.062(3) 0.047(3) -0.024(3) 0.015(2) 0.009(3) 
C21 0.035(3) 0.038(3) 0.110(5) 0.004(3) 0.003(3) 0.006(2) 
C3 0.055(3) 0.083(4) 0.031(3) 0.008(2) 0.005(2) 0.031(3) 
C25 0.063(3) 0.026(2) 0.043(3) 0.007(2) 0.031(2) 0.006(2) 
C26 0.092(4) 0.029(2) 0.030(3) 0.002(2) 0.016(3) -0.005(3) 
 
_geom_special_details 
; 
 All esds (except the esd in the dihedral angle between two l.s. planes) 
 are estimated using the full covariance matrix.  The cell esds are taken 
 into account individually in the estimation of esds in distances, angles 
 and torsion angles; correlations between esds in cell parameters are only 
 used when they are defined by crystal symmetry.  An approximate (isotropic) 
 treatment of cell esds is used for estimating esds involving l.s. planes. 
; 
 
loop_ 
 _geom_bond_atom_site_label_1 
 _geom_bond_atom_site_label_2 
 _geom_bond_distance 
 _geom_bond_site_symmetry_2 
 _geom_bond_publ_flag 
Cd1 O6 2.268(3) . ? 
Cd1 N4 2.265(3) . ? 
Cd1 N3 2.306(3) . ? 
Cd1 O3 2.318(3) . ? 
Cd1 O4 2.391(3) . ? 
Cd1 O5 2.443(3) . ? 
Cd1 C22 2.691(4) . ? 
Cd1 C19 2.695(4) . ? 
O5 C22 1.243(4) . ? 
O4 C19 1.268(5) . ? 
O6 C22 1.262(4) . ? 
C22 C23 1.526(5) . ? 
N1 C7 1.373(5) . ? 
N1 C8 1.396(5) . ? 
N1 H1 0.8600 . ? 
C6 C1 1.393(5) . ? 
C6 C5 1.395(5) . ? 
C6 H6 0.9300 . ? 
O2 C15 1.218(4) . ? 
C5 C4 1.380(6) . ? 
C5 C15 1.488(5) . ? 
N3 C10 1.332(5) . ? 
N3 C11 1.352(5) . ? 
C1 C2 1.398(6) . ? 
C1 C7 1.491(5) . ? 
C12 C11 1.367(5) . ? 
C12 C8 1.391(5) . ? 
C12 H12 0.9300 . ? 
N2 C15 1.376(5) . ? 
N2 C13 1.387(5) . ? 
N2 H2 0.8600 . ? 
C11 H11 0.9300 . ? 
C19 O3 1.242(5) . ? 
C19 C20 1.519(6) . ? 
C18 C17 1.380(5) . ? 
C18 C13 1.381(5) 4_675 ? 
C18 H18 0.9300 . ? 
N4 C16 1.329(5) . ? 
N4 C17 1.338(5) . ? 
C7 O1 1.215(5) . ? 
C14 C16 1.373(6) 4_576 ? 
C14 C13 1.387(5) . ? 
C14 H14 0.9300 . ? 
C17 H17 0.9300 . ? 
C8 C9 1.387(5) . ? 
C23 C24 1.494(6) . ? 
C23 C25 1.517(5) . ? 
C23 H23 0.9800 . ? 
C13 C18 1.381(5) 4_576 ? 
C20 C21 1.512(7) . ? 
C20 C26 1.545(6) . ? 
C20 H20 0.9800 . ? 
C4 C3 1.384(6) . ? 
C4 H4 0.9300 . ? 
C16 C14 1.373(6) 4_675 ? 
C16 H16 0.9300 . ? 
C9 C10 1.378(6) . ? 
C9 H9 0.9300 . ? 
C2 C3 1.358(6) . ? 
C2 H2A 0.9300 . ? 
C24 C21 1.551(6) 1_545 ? 
C24 H24A 0.9700 . ? 
C24 H24B 0.9700 . ? 
C10 H10 0.9300 . ? 
C21 C24 1.551(6) 1_565 ? 
C21 H21A 0.9700 . ? 
C21 H21B 0.9700 . ? 
C3 H3 0.9300 . ? 
C25 C26 1.508(6) 1_545 ? 
C25 H25A 0.9700 . ? 
C25 H25B 0.9700 . ? 
C26 C25 1.508(6) 1_565 ? 
C26 H26A 0.9700 . ? 
C26 H26B 0.9700 . ? 
 
loop_ 
 _geom_angle_atom_site_label_1 
 _geom_angle_atom_site_label_2 
 _geom_angle_atom_site_label_3 
 _geom_angle 
 _geom_angle_site_symmetry_1 
 _geom_angle_site_symmetry_3 
 _geom_angle_publ_flag 
O6 Cd1 N4 105.44(11) . . ? 
O6 Cd1 N3 111.83(11) . . ? 
N4 Cd1 N3 99.73(12) . . ? 
O6 Cd1 O3 142.40(11) . . ? 
N4 Cd1 O3 95.09(12) . . ? 
N3 Cd1 O3 94.82(11) . . ? 
O6 Cd1 O4 97.07(10) . . ? 
N4 Cd1 O4 149.91(11) . . ? 
N3 Cd1 O4 89.89(11) . . ? 
O3 Cd1 O4 55.48(10) . . ? 
O6 Cd1 O5 55.16(9) . . ? 
N4 Cd1 O5 95.41(11) . . ? 
N3 Cd1 O5 162.57(11) . . ? 
O3 Cd1 O5 92.38(11) . . ? 
O4 Cd1 O5 81.16(9) . . ? 
O6 Cd1 C22 27.86(10) . . ? 
N4 Cd1 C22 103.93(11) . . ? 
N3 Cd1 C22 137.81(12) . . ? 
O3 Cd1 C22 116.96(12) . . ? 
O4 Cd1 C22 86.78(10) . . ? 
O5 Cd1 C22 27.47(10) . . ? 
O6 Cd1 C19 121.48(12) . . ? 
N4 Cd1 C19 122.29(13) . . ? 
N3 Cd1 C19 92.59(12) . . ? 
O3 Cd1 C19 27.40(11) . . ? 
O4 Cd1 C19 28.08(11) . . ? 
O5 Cd1 C19 86.53(10) . . ? 
C22 Cd1 C19 103.24(11) . . ? 
C22 O5 Cd1 87.4(2) . . ? 
C19 O4 Cd1 89.4(2) . . ? 
C22 O6 Cd1 95.1(2) . . ? 
O5 C22 O6 121.6(4) . . ? 
O5 C22 C23 117.8(4) . . ? 
O6 C22 C23 120.4(4) . . ? 
O5 C22 Cd1 65.1(2) . . ? 
O6 C22 Cd1 57.07(19) . . ? 
C23 C22 Cd1 167.2(3) . . ? 
C7 N1 C8 125.3(3) . . ? 
C7 N1 H1 117.3 . . ? 
C8 N1 H1 117.3 . . ? 
C1 C6 C5 120.2(4) . . ? 
C1 C6 H6 119.9 . . ? 
C5 C6 H6 119.9 . . ? 
C4 C5 C6 118.6(4) . . ? 
C4 C5 C15 117.0(4) . . ? 
C6 C5 C15 124.4(4) . . ? 
C10 N3 C11 115.2(4) . . ? 
C10 N3 Cd1 123.4(3) . . ? 
C11 N3 Cd1 121.3(3) . . ? 
C6 C1 C2 119.2(4) . . ? 
C6 C1 C7 122.7(4) . . ? 
C2 C1 C7 117.9(4) . . ? 
C11 C12 C8 119.4(4) . . ? 
C11 C12 H12 120.3 . . ? 
C8 C12 H12 120.3 . . ? 
C15 N2 C13 126.6(3) . . ? 
C15 N2 H2 116.7 . . ? 
C13 N2 H2 116.7 . . ? 
N3 C11 C12 124.3(4) . . ? 
N3 C11 H11 117.9 . . ? 
C12 C11 H11 117.9 . . ? 
O3 C19 O4 121.7(4) . . ? 
O3 C19 C20 120.6(4) . . ? 
O4 C19 C20 117.7(4) . . ? 
O3 C19 Cd1 59.2(2) . . ? 
O4 C19 Cd1 62.5(2) . . ? 
C20 C19 Cd1 178.0(3) . . ? 
C17 C18 C13 120.1(4) . 4_675 ? 
C17 C18 H18 120.0 . . ? 
C13 C18 H18 120.0 4_675 . ? 
O2 C15 N2 122.1(4) . . ? 
O2 C15 C5 120.8(4) . . ? 
N2 C15 C5 117.1(3) . . ? 
C16 N4 C17 116.3(4) . . ? 
C16 N4 Cd1 124.2(3) . . ? 
C17 N4 Cd1 119.5(3) . . ? 
O1 C7 N1 123.4(4) . . ? 
O1 C7 C1 120.0(4) . . ? 
N1 C7 C1 116.6(4) . . ? 
C16 C14 C13 118.6(4) 4_576 . ? 
C16 C14 H14 120.7 4_576 . ? 
C13 C14 H14 120.7 . . ? 
N4 C17 C18 122.9(4) . . ? 
N4 C17 H17 118.5 . . ? 
C18 C17 H17 118.5 . . ? 
C19 O3 Cd1 93.4(2) . . ? 
C9 C8 N1 124.0(4) . . ? 
C9 C8 C12 117.3(4) . . ? 
N1 C8 C12 118.7(3) . . ? 
C24 C23 C25 109.5(3) . . ? 
C24 C23 C22 112.6(4) . . ? 
C25 C23 C22 114.4(3) . . ? 
C24 C23 H23 106.6 . . ? 
C25 C23 H23 106.6 . . ? 
C22 C23 H23 106.6 . . ? 
C18 C13 N2 118.0(3) 4_576 . ? 
C18 C13 C14 117.2(4) 4_576 . ? 
N2 C13 C14 124.8(4) . . ? 
C21 C20 C19 115.1(4) . . ? 
C21 C20 C26 111.4(3) . . ? 
C19 C20 C26 108.1(4) . . ? 
C21 C20 H20 107.3 . . ? 
C19 C20 H20 107.3 . . ? 
C26 C20 H20 107.3 . . ? 
C5 C4 C3 121.6(4) . . ? 
C5 C4 H4 119.2 . . ? 
C3 C4 H4 119.2 . . ? 
N4 C16 C14 124.9(4) . 4_675 ? 
N4 C16 H16 117.6 . . ? 
C14 C16 H16 117.6 4_675 . ? 
C10 C9 C8 118.8(4) . . ? 
C10 C9 H9 120.6 . . ? 
C8 C9 H9 120.6 . . ? 
C3 C2 C1 120.8(4) . . ? 
C3 C2 H2A 119.6 . . ? 
C1 C2 H2A 119.6 . . ? 
C23 C24 C21 110.5(4) . 1_545 ? 
C23 C24 H24A 109.6 . . ? 
C21 C24 H24A 109.5 1_545 . ? 
C23 C24 H24B 109.5 . . ? 
C21 C24 H24B 109.5 1_545 . ? 
H24A C24 H24B 108.1 . . ? 
N3 C10 C9 125.0(4) . . ? 
N3 C10 H10 117.5 . . ? 
C9 C10 H10 117.5 . . ? 
C20 C21 C24 113.4(4) . 1_565 ? 
C20 C21 H21A 108.9 . . ? 
C24 C21 H21A 108.9 1_565 . ? 
C20 C21 H21B 108.9 . . ? 
C24 C21 H21B 108.9 1_565 . ? 
H21A C21 H21B 107.7 . . ? 
C2 C3 C4 119.5(4) . . ? 
C2 C3 H3 120.2 . . ? 
C4 C3 H3 120.2 . . ? 
C26 C25 C23 108.9(4) 1_545 . ? 
C26 C25 H25A 109.9 1_545 . ? 
C23 C25 H25A 109.9 . . ? 
C26 C25 H25B 109.9 1_545 . ? 
C23 C25 H25B 109.9 . . ? 
H25A C25 H25B 108.3 . . ? 
C25 C26 C20 112.1(4) 1_565 . ? 
C25 C26 H26A 109.2 1_565 . ? 
C20 C26 H26A 109.2 . . ? 
C25 C26 H26B 109.2 1_565 . ? 
C20 C26 H26B 109.2 . . ? 
H26A C26 H26B 107.9 . . ? 
 
_diffrn_measured_fraction_theta_max    1.000 
_diffrn_reflns_theta_full              25.01 
_diffrn_measured_fraction_theta_full   1.000 
_refine_diff_density_max    0.615 
_refine_diff_density_min   -0.465 
_refine_diff_density_rms    0.101 

#===END
 
data_10030301 
 
_audit_creation_method            SHELXL-97 
_chemical_name_systematic 
; 
 ? 
; 
_chemical_name_common             ? 
_chemical_melting_point           ? 
_chemical_formula_moiety          ? 
_chemical_formula_sum 
 'C51 H28 N9 O13 S2 Zn2' 
_chemical_formula_weight          1169.74 
 
loop_ 
 _atom_type_symbol 
 _atom_type_description 
 _atom_type_scat_dispersion_real 
 _atom_type_scat_dispersion_imag 
 _atom_type_scat_source 
 'C'  'C'   0.0033   0.0016 
 'International Tables Vol C Tables 4.2.6.8 and 6.1.1.4' 
 'N'  'N'   0.0061   0.0033 
 'International Tables Vol C Tables 4.2.6.8 and 6.1.1.4' 
 'O'  'O'   0.0106   0.0060 
 'International Tables Vol C Tables 4.2.6.8 and 6.1.1.4' 
 'S'  'S'   0.1246   0.1234 
 'International Tables Vol C Tables 4.2.6.8 and 6.1.1.4' 
 'Zn'  'Zn'   0.2839   1.4301 
 'International Tables Vol C Tables 4.2.6.8 and 6.1.1.4' 
 'H'  'H'   0.0000   0.0000 
 'International Tables Vol C Tables 4.2.6.8 and 6.1.1.4' 
 
_symmetry_cell_setting            Monoclinic 
_symmetry_space_group_name_H-M    C2/c 
 
loop_ 
 _symmetry_equiv_pos_as_xyz 
 'x, y, z' 
 '-x, y, -z+1/2' 
 'x+1/2, y+1/2, z' 
 '-x+1/2, y+1/2, -z+1/2' 
 '-x, -y, -z' 
 'x, -y, z-1/2' 
 '-x+1/2, -y+1/2, -z' 
 'x+1/2, -y+1/2, z-1/2' 
 
_cell_length_a                    29.482(11) 
_cell_length_b                    9.779(3) 
_cell_length_c                    18.036(7) 
_cell_angle_alpha                 90.00 
_cell_angle_beta                  101.689(6) 
_cell_angle_gamma                 90.00 
_cell_volume                      5092(3) 
_cell_formula_units_Z             4 
_cell_measurement_temperature     293(2) 
_cell_measurement_reflns_used     4711
_cell_measurement_theta_min       2.1987 
_cell_measurement_theta_max       27.4797 
 
_exptl_crystal_description        Prism 
_exptl_crystal_colour             Colorless 
_exptl_crystal_size_max           0.2000 
_exptl_crystal_size_mid           0.1300 
_exptl_crystal_size_min           0.1100 
_exptl_crystal_density_meas       ? 
_exptl_crystal_density_diffrn     1.526 
_exptl_crystal_density_method     'not measured' 
_exptl_crystal_F_000              2371 
_exptl_absorpt_coefficient_mu     1.099 
_exptl_absorpt_correction_type    'Multi-scan' 
_exptl_absorpt_correction_T_min   0.8691 
_exptl_absorpt_correction_T_max   1.0000 
_exptl_absorpt_process_details    'SADABS (Sheldrick, 1996)' 
 
_exptl_special_details 
; 
 ? 
; 
 
_diffrn_ambient_temperature       293(2) 
_diffrn_radiation_wavelength      0.71073 
_diffrn_radiation_type            MoK\a 
_diffrn_radiation_source          'fine-focus sealed tube' 
_diffrn_radiation_monochromator   graphite 
_diffrn_measurement_device_type   'Bruker P4' 
_diffrn_measurement_method        '\w scans' 
_diffrn_detector_area_resol_mean  ? 
_diffrn_standards_number          ? 
_diffrn_standards_interval_count  ? 
_diffrn_standards_interval_time   ? 
_diffrn_standards_decay_%         ? 
_diffrn_reflns_number             19262 
_diffrn_reflns_av_R_equivalents   0.0370 
_diffrn_reflns_av_sigmaI/netI     0.0373 
_diffrn_reflns_limit_h_min        -38 
_diffrn_reflns_limit_h_max        36 
_diffrn_reflns_limit_k_min        -12 
_diffrn_reflns_limit_k_max        11 
_diffrn_reflns_limit_l_min        -23 
_diffrn_reflns_limit_l_max        23 
_diffrn_reflns_theta_min          2.20 
_diffrn_reflns_theta_max          27.47 
_reflns_number_total              5792 
_reflns_number_gt                 4706 
_reflns_threshold_expression      >2sigma(I) 
 
_computing_data_collection        'SMART (Siemens, 1996)' 
_computing_cell_refinement        'SAINT (Siemens, 1996)'
_computing_data_reduction         'SAINT (Siemens, 1996)'
_computing_structure_solution     'SHELXS97 (Sheldrick, 2008)' 
_computing_structure_refinement   'SHELXL97 (Sheldrick, 2008)'
_computing_molecular_graphics     'SHELXTL (Sheldrick, 1997)'
_computing_publication_material   'SHELXTL (Sheldrick, 1997)' 
 
_refine_special_details 
; 
 Refinement of F^2^ against ALL reflections.  The weighted R-factor wR and 
 goodness of fit S are based on F^2^, conventional R-factors R are based 
 on F, with F set to zero for negative F^2^. The threshold expression of 
 F^2^ > 2sigma(F^2^) is used only for calculating R-factors(gt) etc. and is 
 not relevant to the choice of reflections for refinement.  R-factors based 
 on F^2^ are statistically about twice as large as those based on F, and R- 
 factors based on ALL data will be even larger. 
; 
 
_refine_ls_structure_factor_coef  Fsqd  
_refine_ls_matrix_type            full 
_refine_ls_weighting_scheme       calc  
_refine_ls_weighting_details 
 'calc w=1/[\s^2^(Fo^2^)+(0.0631P)^2^+11.8945P] where P=(Fo^2^+2Fc^2^)/3' 
_atom_sites_solution_primary      direct 
_atom_sites_solution_secondary    difmap 
_atom_sites_solution_hydrogens    geom 
_refine_ls_hydrogen_treatment     none 
_refine_ls_extinction_method      none 
_refine_ls_extinction_coef        ? 
_refine_ls_number_reflns          5792 
_refine_ls_number_parameters      414 
_refine_ls_number_restraints      2 
_refine_ls_R_factor_all           0.0763 
_refine_ls_R_factor_gt            0.0609 
_refine_ls_wR_factor_ref          0.1577 
_refine_ls_wR_factor_gt           0.1451 
_refine_ls_goodness_of_fit_ref    1.099 
_refine_ls_restrained_S_all       1.102 
_refine_ls_shift/su_max           0.009 
_refine_ls_shift/su_mean          0.000 
 
loop_ 
 _atom_site_label 
 _atom_site_type_symbol 
 _atom_site_fract_x 
 _atom_site_fract_y 
 _atom_site_fract_z 
 _atom_site_U_iso_or_equiv 
 _atom_site_adp_type 
 _atom_site_occupancy 
 _atom_site_symmetry_multiplicity 
 _atom_site_calc_flag 
 _atom_site_refinement_flags 
 _atom_site_disorder_assembly 
 _atom_site_disorder_group 
S2 S 0.85454(4) 0.80038(10) 0.67192(6) 0.0621(3) Uani 1 1 d . . . 
Zn1A Zn 0.8676(5) 0.3324(12) 0.6305(11) 0.0333(11) Uani 0.40 1 d P . . 
Zn1B Zn 0.8641(6) 0.312(3) 0.6396(9) 0.035(2) Uani 0.30 1 d P . . 
Zn1C Zn 0.8690(7) 0.310(3) 0.6225(13) 0.036(3) Uani 0.30 1 d P . . 
O1 O 0.57186(11) 0.3903(4) 0.00658(19) 0.0810(10) Uani 1 1 d . . . 
O2 O 0.73698(11) 0.1527(3) 0.26914(16) 0.0656(8) Uani 1 1 d . . . 
O3 O 0.85799(10) 0.5018(3) 0.66874(15) 0.0553(7) Uani 1 1 d . . . 
O4 O 0.88356(10) 0.4706(3) 0.79304(16) 0.0620(8) Uani 1 1 d . . . 
N4 N 0.93202(12) 0.3168(3) 0.6059(2) 0.0561(8) Uani 1 1 d . . . 
O5 O 0.8356(4) 0.0890(12) 0.6207(6) 0.130(5) Uani 0.60 1 d P . . 
O6 O 0.8959(4) 0.1808(7) 0.7335(6) 0.094(3) Uani 0.60 1 d P . . 
N1 N 0.76283(11) 0.3699(3) 0.29291(17) 0.0469(7) Uani 1 1 d . . . 
H1 H 0.7645 0.4485 0.2724 0.056 Uiso 1 1 calc R . . 
N2 N 0.57201(12) 0.2219(3) 0.0935(2) 0.0576(8) Uani 1 1 d . . . 
H2 H 0.5898 0.1641 0.1214 0.069 Uiso 1 1 calc R . . 
N3 N 0.82769(12) 0.3416(3) 0.52266(18) 0.0518(8) Uani 1 1 d . . . 
C1 C 0.64482(13) 0.3222(3) 0.0776(2) 0.0450(8) Uani 1 1 d . . . 
C2 C 0.66882(15) 0.3767(4) 0.0257(2) 0.0524(9) Uani 1 1 d . . . 
H2A H 0.6530 0.3998 -0.0226 0.063 Uiso 1 1 calc R . . 
C3 C 0.71582(15) 0.3968(4) 0.0456(2) 0.0592(10) Uani 1 1 d . . . 
H3 H 0.7318 0.4284 0.0095 0.071 Uiso 1 1 calc R . . 
C4 C 0.73975(15) 0.3708(4) 0.1181(2) 0.0556(10) Uani 1 1 d . . . 
H4 H 0.7711 0.3915 0.1322 0.067 Uiso 1 1 calc R . . 
C5 C 0.71634(13) 0.3133(3) 0.1699(2) 0.0432(8) Uani 1 1 d . . . 
C6 C 0.66920(13) 0.2865(3) 0.1493(2) 0.0443(8) Uani 1 1 d . . . 
H6 H 0.6539 0.2446 0.1836 0.053 Uiso 1 1 calc R . . 
C7 C 0.59325(14) 0.3144(4) 0.0552(2) 0.0524(9) Uani 1 1 d . . . 
C9 C 0.52478(14) 0.2103(4) 0.0925(2) 0.0554(10) Uani 1 1 d . . . 
C10 C 0.51048(16) 0.1081(5) 0.1364(3) 0.0739(14) Uani 1 1 d . . . 
H10 H 0.5319 0.0463 0.1625 0.089 Uiso 1 1 calc R . . 
C12 C 0.49040(15) 0.2944(5) 0.0523(3) 0.0643(11) Uani 1 1 d . . . 
H12 H 0.4977 0.3607 0.0197 0.077 Uiso 1 1 calc R . . 
C8 C 0.73995(13) 0.2708(4) 0.2482(2) 0.0450(8) Uani 1 1 d . . . 
C14 C 0.78409(13) 0.3571(4) 0.3695(2) 0.0460(8) Uani 1 1 d . . . 
C18 C 0.7944(4) 0.2313(6) 0.4040(4) 0.103(3) Uani 0.80 1 d P . . 
C17 C 0.8150(4) 0.2299(6) 0.4797(4) 0.101(3) Uani 0.80 1 d P . . 
C16 C 0.82339(16) 0.4566(4) 0.4847(2) 0.0620(11) Uani 1 1 d . . . 
H16 H 0.8357 0.5353 0.5100 0.074 Uiso 1 1 calc R . . 
C15 C 0.80198(17) 0.4684(4) 0.4102(2) 0.0653(12) Uani 1 1 d . . . 
H15 H 0.7996 0.5539 0.3871 0.078 Uiso 1 1 calc R . . 
C23 C 0.87180(12) 0.5434(3) 0.7367(2) 0.0428(8) Uani 1 1 d . . . 
C19 C 0.87314(13) 0.6941(3) 0.7468(2) 0.0433(8) Uani 1 1 d . . . 
C20 C 0.89122(18) 0.7665(4) 0.8103(2) 0.0660(12) Uani 1 1 d . . . 
H20 H 0.9031 0.7267 0.8571 0.079 Uiso 1 1 calc R . . 
C21 C 0.8900(2) 0.9082(4) 0.7973(3) 0.0816(16) Uani 1 1 d . . . 
H21 H 0.9012 0.9724 0.8346 0.098 Uiso 1 1 calc R . . 
C22 C 0.87058(17) 0.9421(4) 0.7245(3) 0.0620(11) Uani 1 1 d . . . 
C13 C 0.44573(16) 0.2786(5) 0.0613(2) 0.0635(11) Uani 1 1 d . . . 
H13 H 0.4234 0.3375 0.0349 0.076 Uiso 1 1 calc R . . 
C11 C 0.46455(16) 0.0987(5) 0.1412(3) 0.0717(13) Uani 1 1 d . . . 
H11 H 0.4559 0.0293 0.1707 0.086 Uiso 1 1 calc R . . 
C24 C 0.8649(3) 0.0797(5) 0.6877(4) 0.098(2) Uani 1 1 d . . . 
O7 O 0.5000 0.8485(6) 0.2500 0.129(3) Uani 1 2 d SD . . 
N5 N 0.5000 0.6216(7) 0.2500 0.099(2) Uani 1 2 d SD . . 
C25 C 0.5000 0.4809(12) 0.2500 0.226(9) Uani 1 2 d S . . 
C27 C 0.5163(5) 0.633(2) 0.3376(6) 0.125(5) Uani 0.50 1 d PD . . 
C26 C 0.5115(4) 0.7344(12) 0.2840(7) 0.087(3) Uani 0.50 1 d PD . . 
C18' C 0.7689(5) 0.2588(17) 0.4198(9) 0.026(3) Uani 0.20 1 d P . . 
O5' O 0.8543(5) 0.0948(19) 0.6332(14) 0.153(10) Uani 0.40 1 d P . . 
C17' C 0.7888(6) 0.257(2) 0.4939(11) 0.034(4) Uani 0.20 1 d P . . 
O6' O 0.8694(4) 0.1770(10) 0.7068(6) 0.062(3) Uani 0.40 1 d P . . 
 
loop_ 
 _atom_site_aniso_label 
 _atom_site_aniso_U_11 
 _atom_site_aniso_U_22 
 _atom_site_aniso_U_33 
 _atom_site_aniso_U_23 
 _atom_site_aniso_U_13 
 _atom_site_aniso_U_12 
S2 0.0876(8) 0.0400(5) 0.0514(6) 0.0115(4) -0.0029(5) 0.0039(5) 
Zn1A 0.056(2) 0.017(3) 0.025(3) 0.000(2) 0.005(2) -0.006(2) 
Zn1B 0.054(2) 0.018(4) 0.032(4) 0.010(3) 0.007(2) -0.0082(18) 
Zn1C 0.053(3) 0.018(3) 0.032(5) -0.009(3) -0.001(3) -0.002(3) 
O1 0.0638(19) 0.094(2) 0.077(2) 0.0441(19) -0.0053(16) 0.0056(18) 
O2 0.097(2) 0.0339(13) 0.0532(17) 0.0057(11) -0.0154(15) -0.0042(14) 
O3 0.0726(18) 0.0357(13) 0.0525(16) -0.0040(11) 0.0006(13) -0.0006(12) 
O4 0.079(2) 0.0337(13) 0.0646(18) 0.0125(12) -0.0066(14) 0.0023(13) 
N4 0.059(2) 0.0480(18) 0.056(2) -0.0056(15) -0.0015(16) -0.0056(15) 
O5 0.180(12) 0.104(8) 0.100(7) 0.058(5) 0.012(7) 0.081(8) 
O6 0.163(9) 0.029(3) 0.104(7) -0.009(4) 0.062(6) -0.020(5) 
N1 0.0603(19) 0.0337(14) 0.0411(16) 0.0033(12) -0.0028(14) 0.0005(13) 
N2 0.0533(19) 0.0509(19) 0.063(2) 0.0156(16) -0.0018(16) 0.0026(15) 
N3 0.067(2) 0.0324(14) 0.0482(18) 0.0019(12) -0.0080(15) -0.0041(14) 
C1 0.056(2) 0.0342(17) 0.0417(19) 0.0006(13) 0.0014(16) 0.0038(15) 
C2 0.068(3) 0.045(2) 0.0392(19) 0.0017(15) -0.0003(17) -0.0026(18) 
C3 0.067(3) 0.062(3) 0.049(2) 0.0102(18) 0.0127(19) -0.003(2) 
C4 0.055(2) 0.049(2) 0.060(2) 0.0060(18) 0.0041(19) -0.0014(18) 
C5 0.056(2) 0.0297(15) 0.0401(18) -0.0008(13) 0.0001(15) 0.0042(14) 
C6 0.052(2) 0.0385(17) 0.0403(18) 0.0018(14) 0.0044(15) 0.0060(15) 
C7 0.059(2) 0.049(2) 0.046(2) 0.0095(16) 0.0002(17) 0.0015(17) 
C9 0.056(2) 0.049(2) 0.055(2) 0.0079(17) -0.0011(18) 0.0032(18) 
C10 0.058(3) 0.063(3) 0.096(4) 0.036(3) 0.003(2) 0.005(2) 
C12 0.061(3) 0.066(3) 0.062(3) 0.024(2) 0.002(2) 0.004(2) 
C8 0.052(2) 0.0351(17) 0.0435(18) 0.0015(14) -0.0006(16) 0.0049(15) 
C14 0.056(2) 0.0345(16) 0.0418(19) 0.0008(14) -0.0032(16) 0.0011(15) 
C18 0.174(9) 0.032(3) 0.073(5) 0.000(3) -0.049(5) 0.004(4) 
C17 0.167(9) 0.039(3) 0.063(5) 0.004(3) -0.060(5) -0.007(5) 
C16 0.091(3) 0.0346(18) 0.050(2) 0.0008(16) -0.010(2) -0.0161(19) 
C15 0.104(3) 0.0345(18) 0.048(2) 0.0082(16) -0.007(2) -0.016(2) 
C23 0.0443(19) 0.0292(15) 0.051(2) 0.0026(14) 0.0013(15) 0.0017(14) 
C19 0.054(2) 0.0301(16) 0.0442(19) 0.0031(13) 0.0071(16) 0.0053(14) 
C20 0.115(4) 0.0366(19) 0.043(2) 0.0020(16) 0.010(2) 0.003(2) 
C21 0.155(5) 0.033(2) 0.059(3) -0.0116(18) 0.027(3) -0.009(3) 
C22 0.096(3) 0.0287(17) 0.069(3) 0.0067(17) 0.037(2) 0.0117(19) 
C13 0.064(3) 0.061(3) 0.060(3) 0.019(2) -0.002(2) 0.012(2) 
C11 0.063(3) 0.060(3) 0.089(3) 0.030(2) 0.007(2) 0.005(2) 
C24 0.162(7) 0.045(3) 0.115(5) 0.023(3) 0.089(5) 0.035(3) 
O7 0.174(7) 0.056(3) 0.163(7) 0.000 0.050(6) 0.000 
N5 0.096(5) 0.051(3) 0.140(7) 0.000 0.003(4) 0.000 
C25 0.218(16) 0.065(7) 0.43(3) 0.000 0.154(18) 0.000 
C27 0.101(10) 0.198(17) 0.069(8) 0.022(9) -0.001(7) 0.014(10) 
C26 0.085(8) 0.088(8) 0.088(8) 0.014(6) 0.014(6) -0.006(6) 
C18' 0.025(7) 0.022(8) 0.031(8) 0.004(6) 0.009(6) -0.003(6) 
O5' 0.070(8) 0.125(13) 0.219(18) 0.135(13) -0.075(9) -0.055(9) 
C17' 0.036(9) 0.037(10) 0.034(8) -0.003(7) 0.015(8) -0.010(7) 
O6' 0.095(8) 0.025(4) 0.062(6) -0.005(3) 0.009(5) -0.006(5) 
 
_geom_special_details 
; 
 All esds (except the esd in the dihedral angle between two l.s. planes) 
 are estimated using the full covariance matrix.  The cell esds are taken 
 into account individually in the estimation of esds in distances, angles 
 and torsion angles; correlations between esds in cell parameters are only 
 used when they are defined by crystal symmetry.  An approximate (isotropic) 
 treatment of cell esds is used for estimating esds involving l.s. planes. 
; 
 
loop_ 
 _geom_bond_atom_site_label_1 
 _geom_bond_atom_site_label_2 
 _geom_bond_distance 
 _geom_bond_site_symmetry_2 
 _geom_bond_publ_flag 
S2 C22 1.692(4) . ? 
S2 C19 1.704(4) . ? 
Zn1A O3 1.838(13) . ? 
Zn1A N4 2.04(2) . ? 
Zn1A O6' 2.04(2) . ? 
Zn1A N3 2.061(15) . ? 
Zn1A O5' 2.36(2) . ? 
Zn1A O6 2.390(18) . ? 
Zn1A O5 2.554(18) . ? 
Zn1B O6' 1.78(2) . ? 
Zn1B O3 1.95(3) . ? 
Zn1B O5' 2.14(3) . ? 
Zn1B O6 2.178(19) . ? 
Zn1B N3 2.183(16) . ? 
Zn1B N4 2.208(17) . ? 
Zn1B O5 2.33(3) . ? 
Zn1B C24 2.43(2) . ? 
Zn1C N4 1.94(3) . ? 
Zn1C N3 1.98(2) . ? 
Zn1C O6' 1.99(4) . ? 
Zn1C O3 2.108(17) . ? 
Zn1C O5' 2.16(4) . ? 
Zn1C O6 2.36(3) . ? 
Zn1C O5 2.37(3) . ? 
Zn1C C24 2.55(4) . ? 
O1 C7 1.222(5) . ? 
O2 C8 1.224(4) . ? 
O3 C23 1.277(4) . ? 
O4 C23 1.233(4) . ? 
N4 C11 1.327(5) 8_556 ? 
N4 C13 1.346(5) 8_556 ? 
O5 O5' 0.557(17) . ? 
O5 C24 1.339(13) . ? 
O6 O6' 0.830(11) . ? 
O6 C24 1.479(12) . ? 
N1 C8 1.350(5) . ? 
N1 C14 1.402(5) . ? 
N1 H1 0.8600 . ? 
N2 C7 1.365(5) . ? 
N2 C9 1.394(5) . ? 
N2 H2 0.8600 . ? 
N3 C16 1.309(5) . ? 
N3 C17 1.348(7) . ? 
N3 C17' 1.421(19) . ? 
C1 C2 1.389(5) . ? 
C1 C6 1.392(5) . ? 
C1 C7 1.494(5) . ? 
C2 C3 1.373(6) . ? 
C2 H2A 0.9300 . ? 
C3 C4 1.379(6) . ? 
C3 H3 0.9300 . ? 
C4 C5 1.388(5) . ? 
C4 H4 0.9300 . ? 
C5 C6 1.389(5) . ? 
C5 C8 1.502(5) . ? 
C6 H6 0.9300 . ? 
C9 C12 1.389(6) . ? 
C9 C10 1.393(6) . ? 
C10 C11 1.377(6) . ? 
C10 H10 0.9300 . ? 
C12 C13 1.368(6) . ? 
C12 H12 0.9300 . ? 
C14 C15 1.358(5) . ? 
C14 C18 1.384(7) . ? 
C14 C18' 1.453(15) . ? 
C18 C18' 0.897(15) . ? 
C18 C17 1.377(9) . ? 
C18 C17' 1.68(2) . ? 
C17 C17' 0.901(16) . ? 
C17 C18' 1.579(19) . ? 
C16 C15 1.369(5) . ? 
C16 H16 0.9300 . ? 
C15 H15 0.9300 . ? 
C23 C19 1.484(4) . ? 
C19 C20 1.361(5) . ? 
C20 C21 1.404(6) . ? 
C20 H20 0.9300 . ? 
C21 C22 1.362(7) . ? 
C21 H21 0.9300 . ? 
C22 C24 1.496(6) 1_565 ? 
C13 N4 1.346(5) 8_455 ? 
C13 H13 0.9300 . ? 
C11 N4 1.327(5) 8_455 ? 
C11 H11 0.9300 . ? 
C24 O5' 0.98(2) . ? 
C24 O6' 1.012(11) . ? 
C24 C22 1.496(6) 1_545 ? 
O7 C26 1.286(11) 2_655 ? 
O7 C26 1.286(11) . ? 
N5 C26 1.275(13) . ? 
N5 C26 1.275(13) 2_655 ? 
N5 C25 1.376(13) . ? 
N5 C27 1.559(11) . ? 
N5 C27 1.559(11) 2_655 ? 
C27 C26 1.368(18) . ? 
C26 C26 1.28(2) 2_655 ? 
C18' C17' 1.35(3) . ? 
O5' O6' 1.54(3) . ? 
 
loop_ 
 _geom_angle_atom_site_label_1 
 _geom_angle_atom_site_label_2 
 _geom_angle_atom_site_label_3 
 _geom_angle 
 _geom_angle_site_symmetry_1 
 _geom_angle_site_symmetry_3 
 _geom_angle_publ_flag 
C22 S2 C19 92.7(2) . . ? 
O3 Zn1A N4 111.7(7) . . ? 
O3 Zn1A O6' 113.7(11) . . ? 
N4 Zn1A O6' 101.1(6) . . ? 
O3 Zn1A N3 102.3(6) . . ? 
N4 Zn1A N3 100.2(10) . . ? 
O6' Zn1A N3 126.9(7) . . ? 
O3 Zn1A O5' 147.2(14) . . ? 
N4 Zn1A O5' 95.6(7) . . ? 
O6' Zn1A O5' 40.1(7) . . ? 
N3 Zn1A O5' 89.9(6) . . ? 
O3 Zn1A O6 108.9(9) . . ? 
N4 Zn1A O6 86.0(5) . . ? 
O6' Zn1A O6 19.6(3) . . ? 
N3 Zn1A O6 143.4(6) . . ? 
O5' Zn1A O6 53.5(6) . . ? 
O3 Zn1A O5 141.5(11) . . ? 
N4 Zn1A O5 105.2(6) . . ? 
O6' Zn1A O5 46.6(5) . . ? 
N3 Zn1A O5 81.0(4) . . ? 
O5' Zn1A O5 12.2(4) . . ? 
O6 Zn1A O5 62.7(5) . . ? 
O6' Zn1B O3 121.5(11) . . ? 
O6' Zn1B O5' 45.1(9) . . ? 
O3 Zn1B O5' 160.1(11) . . ? 
O6' Zn1B O6 21.3(4) . . ? 
O3 Zn1B O6 113.5(10) . . ? 
O5' Zn1B O6 59.4(7) . . ? 
O6' Zn1B N3 135.8(13) . . ? 
O3 Zn1B N3 94.5(8) . . ? 
O5' Zn1B N3 92.7(10) . . ? 
O6 Zn1B N3 151.6(14) . . ? 
O6' Zn1B N4 104.2(11) . . ? 
O3 Zn1B N4 101.0(8) . . ? 
O5' Zn1B N4 97.3(12) . . ? 
O6 Zn1B N4 87.5(8) . . ? 
N3 Zn1B N4 91.5(6) . . ? 
O6' Zn1B O5 52.2(7) . . ? 
O3 Zn1B O5 151.4(9) . . ? 
O5' Zn1B O5 13.4(5) . . ? 
O6 Zn1B O5 69.5(7) . . ? 
N3 Zn1B O5 83.8(8) . . ? 
N4 Zn1B O5 107.5(11) . . ? 
O6' Zn1B C24 21.5(5) . . ? 
O3 Zn1B C24 142.1(8) . . ? 
O5' Zn1B C24 23.7(6) . . ? 
O6 Zn1B C24 37.0(4) . . ? 
N3 Zn1B C24 116.0(10) . . ? 
N4 Zn1B C24 100.2(9) . . ? 
O5 Zn1B C24 32.6(4) . . ? 
N4 Zn1C N3 106.5(14) . . ? 
N4 Zn1C O6' 106.4(11) . . ? 
N3 Zn1C O6' 134.6(15) . . ? 
N4 Zn1C O3 104.9(13) . . ? 
N3 Zn1C O3 95.9(10) . . ? 
O6' Zn1C O3 104.8(10) . . ? 
N4 Zn1C O5' 105.3(10) . . ? 
N3 Zn1C O5' 97.9(9) . . ? 
O6' Zn1C O5' 43.2(10) . . ? 
O3 Zn1C O5' 141.5(17) . . ? 
N4 Zn1C O6 89.1(8) . . ? 
N3 Zn1C O6 153.2(16) . . ? 
O6' Zn1C O6 19.8(4) . . ? 
O3 Zn1C O6 101.1(7) . . ? 
O5' Zn1C O6 56.3(10) . . ? 
N4 Zn1C O5 116.1(9) . . ? 
N3 Zn1C O5 87.4(8) . . ? 
O6' Zn1C O5 50.1(9) . . ? 
O3 Zn1C O5 136.1(13) . . ? 
O5' Zn1C O5 13.1(5) . . ? 
O6 Zn1C O5 66.0(10) . . ? 
N4 Zn1C C24 103.9(9) . . ? 
N3 Zn1C C24 118.7(11) . . ? 
O6' Zn1C C24 21.6(5) . . ? 
O3 Zn1C C24 125.3(12) . . ? 
O5' Zn1C C24 22.1(7) . . ? 
O6 Zn1C C24 34.8(6) . . ? 
O5 Zn1C C24 31.3(5) . . ? 
C23 O3 Zn1A 127.2(5) . . ? 
C23 O3 Zn1B 122.3(5) . . ? 
Zn1A O3 Zn1B 8.2(7) . . ? 
C23 O3 Zn1C 128.3(7) . . ? 
Zn1A O3 Zn1C 1.3(15) . . ? 
Zn1B O3 Zn1C 9.3(12) . . ? 
C11 N4 C13 116.3(4) 8_556 8_556 ? 
C11 N4 Zn1C 124.7(5) 8_556 . ? 
C13 N4 Zn1C 118.6(6) 8_556 . ? 
C11 N4 Zn1A 117.6(5) 8_556 . ? 
C13 N4 Zn1A 125.9(4) 8_556 . ? 
Zn1C N4 Zn1A 7.3(6) . . ? 
C11 N4 Zn1B 119.3(7) 8_556 . ? 
C13 N4 Zn1B 123.2(7) 8_556 . ? 
Zn1C N4 Zn1B 7.0(8) . . ? 
Zn1A N4 Zn1B 6.5(5) . . ? 
O5' O5 C24 40(3) . . ? 
O5' O5 Zn1B 63(3) . . ? 
C24 O5 Zn1B 77.5(8) . . ? 
O5' O5 Zn1C 62(3) . . ? 
C24 O5 Zn1C 81.9(9) . . ? 
Zn1B O5 Zn1C 8.9(7) . . ? 
O5' O5 Zn1A 63(3) . . ? 
C24 O5 Zn1A 80.7(8) . . ? 
Zn1B O5 Zn1A 4.5(7) . . ? 
Zn1C O5 Zn1A 4.7(9) . . ? 
O6' O6 C24 41.0(9) . . ? 
O6' O6 Zn1B 50.9(12) . . ? 
C24 O6 Zn1B 80.7(8) . . ? 
O6' O6 Zn1C 54.4(14) . . ? 
C24 O6 Zn1C 79.6(8) . . ? 
Zn1B O6 Zn1C 8.0(8) . . ? 
O6' O6 Zn1A 55.8(13) . . ? 
C24 O6 Zn1A 84.4(6) . . ? 
Zn1B O6 Zn1A 5.0(5) . . ? 
Zn1C O6 Zn1A 6.6(4) . . ? 
C8 N1 C14 126.4(3) . . ? 
C8 N1 H1 116.8 . . ? 
C14 N1 H1 116.8 . . ? 
C7 N2 C9 127.3(3) . . ? 
C7 N2 H2 116.3 . . ? 
C9 N2 H2 116.3 . . ? 
C16 N3 C17 114.2(4) . . ? 
C16 N3 C17' 108.8(9) . . ? 
C17 N3 C17' 37.9(7) . . ? 
C16 N3 Zn1C 126.0(9) . . ? 
C17 N3 Zn1C 116.2(8) . . ? 
C17' N3 Zn1C 122.7(13) . . ? 
C16 N3 Zn1A 120.5(4) . . ? 
C17 N3 Zn1A 123.1(5) . . ? 
C17' N3 Zn1A 125.7(9) . . ? 
Zn1C N3 Zn1A 7.4(5) . . ? 
C16 N3 Zn1B 126.7(7) . . ? 
C17 N3 Zn1B 118.1(7) . . ? 
C17' N3 Zn1B 118.5(9) . . ? 
Zn1C N3 Zn1B 8.4(9) . . ? 
Zn1A N3 Zn1B 7.2(4) . . ? 
C2 C1 C6 119.0(4) . . ? 
C2 C1 C7 117.8(3) . . ? 
C6 C1 C7 123.0(3) . . ? 
C3 C2 C1 120.3(4) . . ? 
C3 C2 H2A 119.9 . . ? 
C1 C2 H2A 119.9 . . ? 
C2 C3 C4 121.1(4) . . ? 
C2 C3 H3 119.5 . . ? 
C4 C3 H3 119.5 . . ? 
C3 C4 C5 119.0(4) . . ? 
C3 C4 H4 120.5 . . ? 
C5 C4 H4 120.5 . . ? 
C4 C5 C6 120.3(3) . . ? 
C4 C5 C8 123.1(3) . . ? 
C6 C5 C8 116.6(3) . . ? 
C5 C6 C1 120.1(3) . . ? 
C5 C6 H6 120.0 . . ? 
C1 C6 H6 120.0 . . ? 
O1 C7 N2 122.9(4) . . ? 
O1 C7 C1 120.8(4) . . ? 
N2 C7 C1 116.3(3) . . ? 
C12 C9 C10 116.6(4) . . ? 
C12 C9 N2 125.5(4) . . ? 
C10 C9 N2 117.9(4) . . ? 
C11 C10 C9 119.9(4) . . ? 
C11 C10 H10 120.1 . . ? 
C9 C10 H10 120.1 . . ? 
C13 C12 C9 119.3(4) . . ? 
C13 C12 H12 120.3 . . ? 
C9 C12 H12 120.3 . . ? 
O2 C8 N1 123.5(3) . . ? 
O2 C8 C5 120.2(3) . . ? 
N1 C8 C5 116.3(3) . . ? 
C15 C14 C18 116.3(4) . . ? 
C15 C14 N1 120.6(3) . . ? 
C18 C14 N1 122.4(4) . . ? 
C15 C14 C18' 109.1(7) . . ? 
C18 C14 C18' 36.8(6) . . ? 
N1 C14 C18' 122.8(7) . . ? 
C18' C18 C17 85.2(15) . . ? 
C18' C18 C14 75.8(11) . . ? 
C17 C18 C14 117.9(6) . . ? 
C18' C18 C17' 52.9(14) . . ? 
C17 C18 C17' 32.3(7) . . ? 
C14 C18 C17' 104.1(9) . . ? 
C17' C17 N3 75.5(14) . . ? 
C17' C17 C18 92.8(16) . . ? 
N3 C17 C18 125.2(6) . . ? 
C17' C17 C18' 58.4(15) . . ? 
N3 C17 C18' 110.4(8) . . ? 
C18 C17 C18' 34.5(6) . . ? 
N3 C16 C15 124.2(4) . . ? 
N3 C16 H16 117.9 . . ? 
C15 C16 H16 117.9 . . ? 
C14 C15 C16 121.0(4) . . ? 
C14 C15 H15 119.5 . . ? 
C16 C15 H15 119.5 . . ? 
O4 C23 O3 126.1(3) . . ? 
O4 C23 C19 118.5(3) . . ? 
O3 C23 C19 115.5(3) . . ? 
C20 C19 C23 128.0(3) . . ? 
C20 C19 S2 111.0(3) . . ? 
C23 C19 S2 120.8(3) . . ? 
C19 C20 C21 112.3(4) . . ? 
C19 C20 H20 123.8 . . ? 
C21 C20 H20 123.8 . . ? 
C22 C21 C20 113.1(4) . . ? 
C22 C21 H21 123.4 . . ? 
C20 C21 H21 123.4 . . ? 
C21 C22 C24 129.4(5) . 1_565 ? 
C21 C22 S2 110.9(3) . . ? 
C24 C22 S2 119.6(4) 1_565 . ? 
N4 C13 C12 124.2(4) 8_455 . ? 
N4 C13 H13 117.9 8_455 . ? 
C12 C13 H13 117.9 . . ? 
N4 C11 C10 123.6(4) 8_455 . ? 
N4 C11 H11 118.2 8_455 . ? 
C10 C11 H11 118.2 . . ? 
O5' C24 O6' 101.2(14) . . ? 
O5' C24 O5 21.4(13) . . ? 
O6' C24 O5 105.1(10) . . ? 
O5' C24 O6 119.6(10) . . ? 
O6' C24 O6 32.6(8) . . ? 
O5 C24 O6 132.2(8) . . ? 
O5' C24 C22 124.4(14) . 1_545 ? 
O6' C24 C22 134.4(10) . 1_545 ? 
O5 C24 C22 117.1(8) . 1_545 ? 
O6 C24 C22 110.6(7) . 1_545 ? 
O5' C24 Zn1B 61.5(13) . . ? 
O6' C24 Zn1B 40.0(9) . . ? 
O5 C24 Zn1B 69.9(7) . . ? 
O6 C24 Zn1B 62.3(6) . . ? 
C22 C24 Zn1B 172.8(8) 1_545 . ? 
O5' C24 Zn1C 56.0(11) . . ? 
O6' C24 Zn1C 46.6(8) . . ? 
O5 C24 Zn1C 66.8(7) . . ? 
O6 C24 Zn1C 65.6(6) . . ? 
C22 C24 Zn1C 170.5(6) 1_545 . ? 
Zn1B C24 Zn1C 7.9(7) . . ? 
C26 O7 C26 59.6(11) 2_655 . ? 
C26 N5 C26 60.1(10) . 2_655 ? 
C26 N5 C25 149.9(5) . . ? 
C26 N5 C25 149.9(5) 2_655 . ? 
C26 N5 C27 56.7(8) . . ? 
C26 N5 C27 114.9(10) 2_655 . ? 
C25 N5 C27 94.3(8) . . ? 
C26 N5 C27 114.9(10) . 2_655 ? 
C26 N5 C27 56.7(8) 2_655 2_655 ? 
C25 N5 C27 94.3(8) . 2_655 ? 
C27 N5 C27 171.5(15) . 2_655 ? 
C26 C27 N5 51.1(7) . . ? 
N5 C26 C26 59.9(5) . 2_655 ? 
N5 C26 O7 120.1(10) . . ? 
C26 C26 O7 60.2(6) 2_655 . ? 
N5 C26 C27 72.2(9) . . ? 
C26 C26 C27 129.6(10) 2_655 . ? 
O7 C26 C27 160.6(13) . . ? 
C18 C18' C17' 95.1(17) . . ? 
C18 C18' C14 67.4(11) . . ? 
C17' C18' C14 120.0(14) . . ? 
C18 C18' C17 60.4(12) . . ? 
C17' C18' C17 34.7(8) . . ? 
C14 C18' C17 102.5(10) . . ? 
O5 O5' C24 119(4) . . ? 
O5 O5' O6' 120(5) . . ? 
C24 O5' O6' 40.2(11) . . ? 
O5 O5' Zn1B 104(3) . . ? 
C24 O5' Zn1B 94.8(17) . . ? 
O6' O5' Zn1B 54.8(9) . . ? 
O5 O5' Zn1C 105(3) . . ? 
C24 O5' Zn1C 102.0(16) . . ? 
O6' O5' Zn1C 62.7(10) . . ? 
Zn1B O5' Zn1C 9.7(8) . . ? 
O5 O5' Zn1A 104(3) . . ? 
C24 O5' Zn1A 98.6(16) . . ? 
O6' O5' Zn1A 58.8(9) . . ? 
Zn1B O5' Zn1A 5.0(8) . . ? 
Zn1C O5' Zn1A 4.8(11) . . ? 
C17 C17' C18' 86.9(16) . . ? 
C17 C17' N3 66.7(13) . . ? 
C18' C17' N3 120.8(14) . . ? 
C17 C17' C18 54.8(11) . . ? 
C18' C17' C18 32.1(7) . . ? 
N3 C17' C18 102.1(10) . . ? 
O6 O6' C24 106.4(16) . . ? 
O6 O6' O5' 126.6(18) . . ? 
C24 O6' O5' 38.6(7) . . ? 
O6 O6' Zn1B 107.8(15) . . ? 
C24 O6' Zn1B 118.5(13) . . ? 
O5' O6' Zn1B 80.1(11) . . ? 
O6 O6' Zn1C 105.9(15) . . ? 
C24 O6' Zn1C 111.8(10) . . ? 
O5' O6' Zn1C 74.1(8) . . ? 
Zn1B O6' Zn1C 8.9(10) . . ? 
O6 O6' Zn1A 104.5(14) . . ? 
C24 O6' Zn1A 119.1(10) . . ? 
O5' O6' Zn1A 81.1(8) . . ? 
Zn1B O6' Zn1A 3.5(8) . . ? 
Zn1C O6' Zn1A 7.6(5) . . ? 
 
_diffrn_measured_fraction_theta_max    0.992 
_diffrn_reflns_theta_full              27.47 
_diffrn_measured_fraction_theta_full   0.992 
_refine_diff_density_max    0.395 
_refine_diff_density_min   -0.477 
_refine_diff_density_rms    0.068 

#===END
 
data_100311 
 
_audit_creation_method            SHELXL-97 
_chemical_name_systematic 
; 
 ? 
; 
_chemical_name_common             ? 
_chemical_melting_point           ? 
_chemical_formula_moiety          ? 
_chemical_formula_sum 
 'C16 H12 N3 O7 S Zn' 
_chemical_formula_weight          455.75 
 
loop_ 
 _atom_type_symbol 
 _atom_type_description 
 _atom_type_scat_dispersion_real 
 _atom_type_scat_dispersion_imag 
 _atom_type_scat_source 
 'C'  'C'   0.0033   0.0016 
 'International Tables Vol C Tables 4.2.6.8 and 6.1.1.4' 
 'N'  'N'   0.0061   0.0033 
 'International Tables Vol C Tables 4.2.6.8 and 6.1.1.4' 
 'O'  'O'   0.0106   0.0060 
 'International Tables Vol C Tables 4.2.6.8 and 6.1.1.4' 
 'S'  'S'   0.1246   0.1234 
 'International Tables Vol C Tables 4.2.6.8 and 6.1.1.4' 
 'Zn'  'Zn'   0.2839   1.4301 
 'International Tables Vol C Tables 4.2.6.8 and 6.1.1.4' 
 'H'  'H'   0.0000   0.0000 
 'International Tables Vol C Tables 4.2.6.8 and 6.1.1.4' 
 
_symmetry_cell_setting            Monoclinic 
_symmetry_space_group_name_H-M    P21/c 
 
loop_ 
 _symmetry_equiv_pos_as_xyz 
 'x, y, z' 
 '-x, y+1/2, -z+1/2' 
 '-x, -y, -z' 
 'x, -y-1/2, z-1/2' 
 
_cell_length_a                    12.3410(11) 
_cell_length_b                    14.0421(13) 
_cell_length_c                    11.4300(10) 
_cell_angle_alpha                 90.00 
_cell_angle_beta                  96.641(5) 
_cell_angle_gamma                 90.00 
_cell_volume                      1967.5(3) 
_cell_formula_units_Z             4 
_cell_measurement_temperature     293(2) 
_cell_measurement_reflns_used     5146
_cell_measurement_theta_min       3.3237 
_cell_measurement_theta_max       27.4797
 
_exptl_crystal_description        'Prism' 
_exptl_crystal_colour             white 
_exptl_crystal_size_max           0.0800
_exptl_crystal_size_mid           0.0500
_exptl_crystal_size_min           0.0500 
_exptl_crystal_density_meas       ? 
_exptl_crystal_density_diffrn     1.539 
_exptl_crystal_density_method     'not measured' 
_exptl_crystal_F_000              924 
_exptl_absorpt_coefficient_mu     1.397 
_exptl_absorpt_correction_type    'Multi-Scan' 
_exptl_absorpt_correction_T_min   0.6244
_exptl_absorpt_correction_T_max   1.0000 
_exptl_absorpt_process_details    'SADABS (Sheldrick, 1996)' 
 
_exptl_special_details 
; 
 ? 
; 
 
_diffrn_ambient_temperature       293(2) 
_diffrn_radiation_wavelength      0.71073 
_diffrn_radiation_type            MoK\a 
_diffrn_radiation_source          'fine-focus sealed tube' 
_diffrn_radiation_monochromator   graphite 
_diffrn_measurement_device_type   'Bruker P4' 
_diffrn_measurement_method        '\w scans' 
_diffrn_detector_area_resol_mean  ? 
_diffrn_standards_number          ? 
_diffrn_standards_interval_count  ? 
_diffrn_standards_interval_time   ? 
_diffrn_standards_decay_%         ? 
_diffrn_reflns_number             12164 
_diffrn_reflns_av_R_equivalents   0.0234 
_diffrn_reflns_av_sigmaI/netI     0.0206 
_diffrn_reflns_limit_h_min        -14 
_diffrn_reflns_limit_h_max        14 
_diffrn_reflns_limit_k_min        -16 
_diffrn_reflns_limit_k_max        16 
_diffrn_reflns_limit_l_min        -13 
_diffrn_reflns_limit_l_max        13 
_diffrn_reflns_theta_min          2.96 
_diffrn_reflns_theta_max          25.01 
_reflns_number_total              3463 
_reflns_number_gt                 3167 
_reflns_threshold_expression      >2sigma(I) 
 
_computing_data_collection        'SMART (Siemens, 1996)' 
_computing_cell_refinement        'SAINT (Siemens, 1996)' 
_computing_data_reduction         'SAINT (Siemens, 1996)'
_computing_structure_solution     'SHELXS97 (Sheldrick, 2008)' 
_computing_structure_refinement   'SHELXL97 (Sheldrick, 2008)'
_computing_molecular_graphics     'SHELXTL (Sheldrick, 1997)'
_computing_publication_material   'SHELXTL (Sheldrick, 1997)' 
 
_refine_special_details 
; 
 Refinement of F^2^ against ALL reflections.  The weighted R-factor wR and 
 goodness of fit S are based on F^2^, conventional R-factors R are based 
 on F, with F set to zero for negative F^2^. The threshold expression of 
 F^2^ > 2sigma(F^2^) is used only for calculating R-factors(gt) etc. and is 
 not relevant to the choice of reflections for refinement.  R-factors based 
 on F^2^ are statistically about twice as large as those based on F, and R- 
 factors based on ALL data will be even larger. 
; 
 
_refine_ls_structure_factor_coef  Fsqd  
_refine_ls_matrix_type            full 
_refine_ls_weighting_scheme       calc  
_refine_ls_weighting_details 
 'calc w=1/[\s^2^(Fo^2^)+(0.0433P)^2^+0.8625P] where P=(Fo^2^+2Fc^2^)/3' 
_atom_sites_solution_primary      direct 
_atom_sites_solution_secondary    difmap 
_atom_sites_solution_hydrogens    geom 
_refine_ls_hydrogen_treatment     none 
_refine_ls_extinction_method      none 
_refine_ls_extinction_coef        ? 
_refine_ls_number_reflns          3463 
_refine_ls_number_parameters      315 
_refine_ls_number_restraints      0 
_refine_ls_R_factor_all           0.0341 
_refine_ls_R_factor_gt            0.0309 
_refine_ls_wR_factor_ref          0.0858 
_refine_ls_wR_factor_gt           0.0836 
_refine_ls_goodness_of_fit_ref    1.116 
_refine_ls_restrained_S_all       1.116 
_refine_ls_shift/su_max           0.032 
_refine_ls_shift/su_mean          0.005 
 
loop_ 
 _atom_site_label 
 _atom_site_type_symbol 
 _atom_site_fract_x 
 _atom_site_fract_y 
 _atom_site_fract_z 
 _atom_site_U_iso_or_equiv 
 _atom_site_adp_type 
 _atom_site_occupancy 
 _atom_site_symmetry_multiplicity 
 _atom_site_calc_flag 
 _atom_site_refinement_flags 
 _atom_site_disorder_assembly 
 _atom_site_disorder_group 
Zn1 Zn 0.9807(3) 0.4526(3) 0.3089(3) 0.0487(15) Uani 0.50 1 d P . . 
Zn2 Zn 1.0171(2) 0.5460(2) 0.6915(3) 0.0259(9) Uani 0.50 1 d P . . 
S1 S 0.8541(7) 0.4156(4) 0.5215(4) 0.0244(11) Uani 0.50 1 d P . . 
S1' S 0.8696(8) 0.4171(4) 0.5254(6) 0.0403(18) Uani 0.50 1 d P . . 
O1 O 0.53050(17) 0.79794(16) 0.7693(2) 0.0765(8) Uani 1 1 d . . . 
O4 O 1.0471(9) 0.6242(10) 0.5622(13) 0.0312(16) Uani 0.50 1 d P . . 
O2 O 1.12841(15) 0.48657(15) 0.80483(17) 0.0505(5) Uani 1 1 d . . . 
O3 O 1.19093(17) 0.63288(16) 0.8021(2) 0.0630(6) Uani 1 1 d . . . 
O5 O 1.0851(12) 0.5666(11) 0.3725(10) 0.0283(17) Uani 0.50 1 d P . . 
O4' O 0.9299(10) 0.3885(11) 0.4508(13) 0.0337(19) Uani 0.50 1 d P . . 
O5' O 0.9328(12) 0.4421(11) 0.6548(11) 0.0320(17) Uani 0.50 1 d P . . 
O6 O 0.789(2) 0.3304(11) 0.5467(17) 0.051(3) Uani 0.50 1 d P . . 
O7' O 0.8242(14) 0.5038(19) 0.479(2) 0.051(4) Uani 0.50 1 d P . . 
O7 O 0.7965(14) 0.500(2) 0.471(2) 0.045(3) Uani 0.50 1 d P . . 
O6' O 0.782(2) 0.3535(12) 0.534(2) 0.063(4) Uani 0.50 1 d P . . 
N1 N 0.91031(16) 0.63820(15) 0.75248(18) 0.0401(5) Uani 1 1 d . . . 
N2 N 0.69811(17) 0.85100(16) 0.8420(2) 0.0438(5) Uani 1 1 d . . . 
C2 C 0.8726(2) 0.77948(18) 0.8560(2) 0.0427(6) Uani 1 1 d . . . 
H2 H 0.8987 0.8279 0.9072 0.051 Uiso 1 1 calc R . . 
C3 C 0.76391(19) 0.77676(17) 0.8122(2) 0.0379(6) Uani 1 1 d . . . 
C4 C 0.7289(2) 0.7016(2) 0.7392(3) 0.0509(7) Uani 1 1 d . . . 
H4 H 0.6559 0.6960 0.7091 0.061 Uiso 1 1 calc R . . 
C5 C 0.8037(2) 0.6358(2) 0.7120(3) 0.0514(7) Uani 1 1 d . . . 
H5 H 0.7791 0.5860 0.6622 0.062 Uiso 1 1 calc R . . 
C6 C 0.5880(2) 0.8612(2) 0.8150(2) 0.0471(6) Uani 1 1 d . . . 
C7 C 0.5442(2) 0.9554(2) 0.8530(3) 0.0510(7) Uani 1 1 d . . . 
H7A H 0.4784 0.9712 0.8020 0.061 Uiso 1 1 calc R . . 
H7B H 0.5976 1.0050 0.8447 0.061 Uiso 1 1 calc R . . 
C8 C 0.5190(3) 0.95252(19) 0.9797(3) 0.0500(7) Uani 1 1 d . . . 
H8A H 0.4629 0.9053 0.9871 0.060 Uiso 1 1 calc R . . 
H8B H 0.5839 0.9333 1.0302 0.060 Uiso 1 1 calc R . . 
C10 C 1.3068(2) 0.5159(2) 0.9008(2) 0.0411(6) Uani 1 1 d . . . 
C12 C 1.3957(2) 0.5753(2) 0.9125(2) 0.0438(6) Uani 1 1 d . . . 
H12 H 1.3898 0.6358 0.8792 0.053 Uiso 1 1 calc R . . 
C13 C 1.4965(2) 0.54625(18) 0.9745(2) 0.0403(6) Uani 1 1 d . . . 
C14 C 1.5899(2) 0.6052(2) 0.9873(3) 0.0533(7) Uani 1 1 d . . . 
H14 H 1.5861 0.6655 0.9536 0.064 Uiso 1 1 calc R . . 
C11 C 1.3147(2) 0.4247(2) 0.9519(3) 0.0516(7) Uani 1 1 d . . . 
H11 H 1.2544 0.3845 0.9442 0.062 Uiso 1 1 calc R . . 
C9 C 1.2022(2) 0.5484(2) 0.8314(2) 0.0437(6) Uani 1 1 d . . . 
C1 C 0.9422(2) 0.71067(19) 0.8239(2) 0.0434(6) Uani 1 1 d . . . 
H1 H 1.0156 0.7147 0.8534 0.052 Uiso 1 1 calc R . . 
N3 N 0.8241(3) 0.3043(2) 0.8140(3) 0.0643(8) Uani 0.90 1 d P . . 
C15 C 0.9034(4) 0.3544(3) 0.8968(3) 0.0839(12) Uani 1 1 d . . . 
C16 C 0.7102(3) 0.3275(4) 0.8230(4) 0.1065(16) Uani 1 1 d . . . 
H1A H 0.734(3) 0.900(2) 0.879(3) 0.057(9) Uiso 1 1 d . . . 
N3' N 0.8090(14) 0.2927(12) 0.8845(17) 0.022(4) Uiso 0.10 1 d P . . 
 
loop_ 
 _atom_site_aniso_label 
 _atom_site_aniso_U_11 
 _atom_site_aniso_U_22 
 _atom_site_aniso_U_33 
 _atom_site_aniso_U_23 
 _atom_site_aniso_U_13 
 _atom_site_aniso_U_12 
Zn1 0.046(2) 0.051(2) 0.046(2) 0.0002(15) -0.0084(15) 0.0067(15) 
Zn2 0.0194(13) 0.0300(16) 0.0284(16) -0.0039(11) 0.0031(11) 0.0066(10) 
S1 0.0173(19) 0.0352(18) 0.0194(16) -0.0053(10) -0.0033(11) 0.0022(10) 
S1' 0.026(3) 0.0282(17) 0.064(3) 0.0109(15) -0.0066(12) -0.0017(11) 
O1 0.0347(11) 0.0769(16) 0.116(2) -0.0472(15) -0.0016(12) 0.0045(10) 
O4 0.024(5) 0.039(4) 0.033(4) -0.004(3) 0.017(3) 0.027(3) 
O2 0.0342(10) 0.0662(12) 0.0474(11) -0.0005(9) -0.0108(8) 0.0027(9) 
O3 0.0478(12) 0.0612(14) 0.0742(15) 0.0011(11) -0.0178(10) 0.0117(10) 
O5 0.034(4) 0.043(3) 0.001(5) -0.013(3) -0.033(3) -0.011(3) 
O4' 0.025(5) 0.041(4) 0.041(3) -0.005(3) 0.029(3) 0.032(3) 
O5' 0.036(5) 0.045(4) 0.008(5) -0.010(3) -0.029(3) -0.011(3) 
O6 0.063(5) 0.026(5) 0.064(5) 0.005(4) 0.007(3) -0.017(4) 
O7' 0.045(9) 0.047(4) 0.055(4) 0.009(3) -0.022(6) 0.024(7) 
O7 0.031(7) 0.054(4) 0.045(5) 0.000(3) -0.012(5) 0.026(5) 
O6' 0.053(5) 0.046(9) 0.091(6) 0.014(5) 0.008(4) -0.027(6) 
N1 0.0340(11) 0.0437(12) 0.0422(11) -0.0095(9) 0.0023(9) 0.0029(9) 
N2 0.0324(12) 0.0436(13) 0.0547(13) -0.0193(11) 0.0018(10) 0.0009(9) 
C2 0.0362(14) 0.0424(14) 0.0479(15) -0.0151(12) -0.0015(11) -0.0047(11) 
C3 0.0320(13) 0.0407(13) 0.0409(13) -0.0069(11) 0.0042(10) -0.0020(10) 
C4 0.0313(14) 0.0559(17) 0.0634(18) -0.0275(14) -0.0029(12) 0.0035(12) 
C5 0.0354(14) 0.0546(17) 0.0620(18) -0.0260(14) -0.0032(13) 0.0039(12) 
C6 0.0368(14) 0.0528(16) 0.0512(16) -0.0137(13) 0.0029(12) 0.0019(12) 
C7 0.0463(17) 0.0536(17) 0.0532(17) -0.0082(13) 0.0056(13) 0.0139(13) 
C8 0.0499(17) 0.0494(17) 0.0516(17) -0.0035(12) 0.0101(14) 0.0108(12) 
C10 0.0314(13) 0.0578(16) 0.0321(12) -0.0056(11) -0.0049(10) 0.0070(12) 
C12 0.0390(14) 0.0518(15) 0.0383(14) 0.0005(12) -0.0049(11) 0.0073(12) 
C13 0.0322(13) 0.0526(15) 0.0345(13) -0.0021(10) -0.0033(10) 0.0043(11) 
C14 0.0433(16) 0.0538(16) 0.0592(17) 0.0115(14) -0.0088(13) -0.0007(13) 
C11 0.0358(15) 0.0600(18) 0.0557(17) 0.0033(14) -0.0084(13) -0.0052(13) 
C9 0.0343(15) 0.0605(18) 0.0344(13) -0.0074(12) -0.0041(11) 0.0113(12) 
C1 0.0294(13) 0.0530(15) 0.0458(14) -0.0072(12) -0.0039(11) -0.0018(11) 
N3 0.0593(19) 0.0628(19) 0.070(2) -0.0091(16) 0.0031(16) 0.0095(14) 
C15 0.104(3) 0.085(3) 0.058(2) 0.0048(19) -0.007(2) -0.027(2) 
C16 0.065(3) 0.163(5) 0.090(3) -0.008(3) 0.003(2) 0.038(3) 
 
_geom_special_details 
; 
 All esds (except the esd in the dihedral angle between two l.s. planes) 
 are estimated using the full covariance matrix.  The cell esds are taken 
 into account individually in the estimation of esds in distances, angles 
 and torsion angles; correlations between esds in cell parameters are only 
 used when they are defined by crystal symmetry.  An approximate (isotropic) 
 treatment of cell esds is used for estimating esds involving l.s. planes. 
; 
 
loop_ 
 _geom_bond_atom_site_label_1 
 _geom_bond_atom_site_label_2 
 _geom_bond_distance 
 _geom_bond_site_symmetry_2 
 _geom_bond_publ_flag 
Zn1 Zn2 0.034(7) 3_766 ? 
Zn1 O5' 1.843(13) 3_766 ? 
Zn1 O4 1.889(16) 3_766 ? 
Zn1 O2 1.957(4) 3_766 ? 
Zn1 O4' 2.018(16) . ? 
Zn1 N1 2.035(4) 3_766 ? 
Zn1 O5 2.129(12) . ? 
Zn1 C9 2.614(5) 3_766 ? 
Zn1 O3 2.630(5) 3_766 ? 
Zn2 Zn1 0.034(7) 3_766 ? 
Zn2 O5' 1.813(13) . ? 
Zn2 O4 1.912(16) . ? 
Zn2 O2 1.962(4) . ? 
Zn2 N1 2.027(3) . ? 
Zn2 O4' 2.042(16) 3_766 ? 
Zn2 O5 2.101(12) 3_766 ? 
S1 O6' 1.26(2) . ? 
S1 O4' 1.360(8) . ? 
S1 O7' 1.37(3) . ? 
S1 O5 1.373(8) 3_766 ? 
S1 O7 1.47(3) . ? 
S1 O6 1.49(2) . ? 
S1 O4 1.727(13) 3_766 ? 
S1 O5' 1.750(14) . ? 
S1' O5 1.255(13) 3_766 ? 
S1' O4' 1.261(14) . ? 
S1' O6' 1.41(2) . ? 
S1' O7' 1.42(3) . ? 
S1' O7 1.56(2) . ? 
S1' O6 1.61(2) . ? 
S1' O4 1.622(8) 3_766 ? 
S1' O5' 1.628(8) . ? 
O1 C6 1.216(3) . ? 
O4 O4' 0.379(13) 3_766 ? 
O4 S1' 1.622(8) 3_766 ? 
O4 S1 1.727(13) 3_766 ? 
O4 Zn1 1.889(16) 3_766 ? 
O2 C9 1.270(3) . ? 
O2 Zn1 1.957(4) 3_766 ? 
O3 C9 1.236(3) . ? 
O3 Zn1 2.630(5) 3_766 ? 
O5 O5' 0.381(13) 3_766 ? 
O5 S1' 1.255(13) 3_766 ? 
O5 S1 1.373(8) 3_766 ? 
O5 Zn2 2.101(12) 3_766 ? 
O4' O4 0.379(13) 3_766 ? 
O4' Zn2 2.042(16) 3_766 ? 
O5' O5 0.381(13) 3_766 ? 
O5' Zn1 1.843(13) 3_766 ? 
N1 C1 1.335(3) . ? 
N1 C5 1.344(3) . ? 
N1 Zn1 2.035(4) 3_766 ? 
N2 C6 1.365(3) . ? 
N2 C3 1.388(3) . ? 
N2 H1A 0.90(3) . ? 
C2 C1 1.371(4) . ? 
C2 C3 1.376(3) . ? 
C2 H2 0.9300 . ? 
C3 C4 1.383(3) . ? 
C4 C5 1.367(4) . ? 
C4 H4 0.9300 . ? 
C5 H5 0.9300 . ? 
C6 C7 1.512(4) . ? 
C7 C8 1.517(4) . ? 
C7 H7A 0.9700 . ? 
C7 H7B 0.9700 . ? 
C8 C8 1.504(5) 3_677 ? 
C8 H8A 0.9700 . ? 
C8 H8B 0.9700 . ? 
C10 C12 1.373(4) . ? 
C10 C11 1.406(4) . ? 
C10 C9 1.505(4) . ? 
C12 C13 1.418(4) . ? 
C12 H12 0.9300 . ? 
C13 C14 1.413(4) . ? 
C13 C13 1.422(5) 3_867 ? 
C14 C11 1.362(4) 3_867 ? 
C14 H14 0.9300 . ? 
C11 C14 1.362(4) 3_867 ? 
C11 H11 0.9300 . ? 
C9 Zn1 2.614(5) 3_766 ? 
C1 H1 0.9300 . ? 
N3 N3' 0.864(18) . ? 
N3 C16 1.459(5) . ? 
N3 C15 1.461(5) . ? 
C15 N3' 1.446(18) . ? 
C16 N3' 1.422(18) . ? 
 
loop_ 
 _geom_angle_atom_site_label_1 
 _geom_angle_atom_site_label_2 
 _geom_angle_atom_site_label_3 
 _geom_angle 
 _geom_angle_site_symmetry_1 
 _geom_angle_site_symmetry_3 
 _geom_angle_publ_flag 
Zn2 Zn1 O5' 29(10) 3_766 3_766 ? 
Zn2 Zn1 O4 131(10) 3_766 3_766 ? 
O5' Zn1 O4 115.8(6) 3_766 3_766 ? 
Zn2 Zn1 O2 99(10) 3_766 3_766 ? 
O5' Zn1 O2 97.8(5) 3_766 3_766 ? 
O4 Zn1 O2 126.4(4) 3_766 3_766 ? 
Zn2 Zn1 O4' 134(10) 3_766 . ? 
O5' Zn1 O4' 113.8(7) 3_766 . ? 
O4 Zn1 O4' 10.5(4) 3_766 . ? 
O2 Zn1 O4' 118.3(4) 3_766 . ? 
Zn2 Zn1 N1 75(10) 3_766 3_766 ? 
O5' Zn1 N1 101.1(5) 3_766 3_766 ? 
O4 Zn1 N1 95.7(3) 3_766 3_766 ? 
O2 Zn1 N1 118.4(2) 3_766 3_766 ? 
O4' Zn1 N1 106.1(3) . 3_766 ? 
Zn2 Zn1 O5 33(10) 3_766 . ? 
O5' Zn1 O5 7.3(8) 3_766 . ? 
O4 Zn1 O5 108.7(6) 3_766 . ? 
O2 Zn1 O5 103.9(4) 3_766 . ? 
O4' Zn1 O5 107.0(6) . . ? 
N1 Zn1 O5 101.0(5) 3_766 . ? 
Zn2 Zn1 C9 124(10) 3_766 3_766 ? 
O5' Zn1 C9 125.4(5) 3_766 3_766 ? 
O4 Zn1 C9 104.7(4) 3_766 3_766 ? 
O2 Zn1 C9 27.79(10) 3_766 3_766 ? 
O4' Zn1 C9 99.4(5) . 3_766 ? 
N1 Zn1 C9 110.10(18) 3_766 3_766 ? 
O5 Zn1 C9 131.2(4) . 3_766 ? 
Zn2 Zn1 O3 143(10) 3_766 3_766 ? 
O5' Zn1 O3 152.6(5) 3_766 3_766 ? 
O4 Zn1 O3 84.7(5) 3_766 3_766 ? 
O2 Zn1 O3 54.87(12) 3_766 3_766 ? 
O4' Zn1 O3 82.9(5) . 3_766 ? 
N1 Zn1 O3 94.32(16) 3_766 3_766 ? 
O5 Zn1 O3 158.3(4) . 3_766 ? 
C9 Zn1 O3 27.27(8) 3_766 3_766 ? 
Zn1 Zn2 O5' 151(10) 3_766 . ? 
Zn1 Zn2 O4 48(10) 3_766 . ? 
O5' Zn2 O4 116.1(7) . . ? 
Zn1 Zn2 O2 80(10) 3_766 . ? 
O5' Zn2 O2 98.6(5) . . ? 
O4 Zn2 O2 124.8(4) . . ? 
Zn1 Zn2 N1 104(10) 3_766 . ? 
O5' Zn2 N1 102.4(5) . . ? 
O4 Zn2 N1 95.2(3) . . ? 
O2 Zn2 N1 118.57(16) . . ? 
Zn1 Zn2 O4' 46(10) 3_766 3_766 ? 
O5' Zn2 O4' 114.0(7) . 3_766 ? 
O4 Zn2 O4' 10.3(4) . 3_766 ? 
O2 Zn2 O4' 116.9(4) . 3_766 ? 
N1 Zn2 O4' 105.5(3) . 3_766 ? 
Zn1 Zn2 O5 147(10) 3_766 3_766 ? 
O5' Zn2 O5 7.3(8) . 3_766 ? 
O4 Zn2 O5 109.0(6) . 3_766 ? 
O2 Zn2 O5 104.8(4) . 3_766 ? 
N1 Zn2 O5 102.3(5) . 3_766 ? 
O4' Zn2 O5 107.2(6) 3_766 3_766 ? 
O6' S1 O4' 114.5(13) . . ? 
O6' S1 O7' 120.3(14) . . ? 
O4' S1 O7' 102.7(13) . . ? 
O6' S1 O5 109.9(13) . 3_766 ? 
O4' S1 O5 103.4(13) . 3_766 ? 
O7' S1 O5 104.3(13) . 3_766 ? 
O6' S1 O7 107.0(14) . . ? 
O4' S1 O7 109.2(12) . . ? 
O7' S1 O7 13.4(16) . . ? 
O5 S1 O7 112.9(12) 3_766 . ? 
O6' S1 O6 11.7(18) . . ? 
O4' S1 O6 108.3(12) . . ? 
O7' S1 O6 132.0(14) . . ? 
O5 S1 O6 103.2(11) 3_766 . ? 
O7 S1 O6 118.7(14) . . ? 
O6' S1 O4 113.0(12) . 3_766 ? 
O4' S1 O4 3.5(12) . 3_766 ? 
O7' S1 O4 106.0(12) . 3_766 ? 
O5 S1 O4 101.4(10) 3_766 3_766 ? 
O7 S1 O4 112.7(11) . 3_766 ? 
O6 S1 O4 106.2(10) . 3_766 ? 
O6' S1 O5' 111.7(12) . . ? 
O4' S1 O5' 103.1(10) . . ? 
O7' S1 O5' 102.6(12) . . ? 
O5 S1 O5' 2.0(12) 3_766 . ? 
O7 S1 O5' 111.3(11) . . ? 
O6 S1 O5' 105.1(10) . . ? 
O4 S1 O5' 101.2(8) 3_766 . ? 
O5 S1' O4' 116.9(12) 3_766 . ? 
O5 S1' O6' 108.0(12) 3_766 . ? 
O4' S1' O6' 111.3(13) . . ? 
O5 S1' O7' 107.8(13) 3_766 . ? 
O4' S1' O7' 105.0(14) . . ? 
O6' S1' O7' 107.4(13) . . ? 
O5 S1' O7 114.1(12) 3_766 . ? 
O4' S1' O7 109.2(12) . . ? 
O6' S1' O7 95.3(13) . . ? 
O7' S1' O7 12.2(17) . . ? 
O5 S1' O6 102.4(11) 3_766 . ? 
O4' S1' O6 106.6(11) . . ? 
O6' S1' O6 11.4(15) . . ? 
O7' S1' O6 118.8(13) . . ? 
O7 S1' O6 106.7(13) . . ? 
O5 S1' O4 113.1(11) 3_766 3_766 ? 
O4' S1' O4 4.5(12) . 3_766 ? 
O6' S1' O4 111.2(12) . 3_766 ? 
O7' S1' O4 109.0(12) . 3_766 ? 
O7 S1' O4 113.6(11) . 3_766 ? 
O6 S1' O4 105.7(10) . 3_766 ? 
O5 S1' O5' 3.0(13) 3_766 . ? 
O4' S1' O5' 115.2(11) . . ? 
O6' S1' O5' 111.0(12) . . ? 
O7' S1' O5' 106.3(13) . . ? 
O7 S1' O5' 113.1(12) . . ? 
O6 S1' O5' 105.4(10) . . ? 
O4 S1' O5' 111.5(11) 3_766 . ? 
O4' O4 S1' 15(4) 3_766 3_766 ? 
O4' O4 S1 13(4) 3_766 3_766 ? 
S1' O4 S1 5.5(6) 3_766 3_766 ? 
O4' O4 Zn1 104(5) 3_766 3_766 ? 
S1' O4 Zn1 117.6(8) 3_766 3_766 ? 
S1 O4 Zn1 116.8(7) 3_766 3_766 ? 
O4' O4 Zn2 105(5) 3_766 . ? 
S1' O4 Zn2 117.8(8) 3_766 . ? 
S1 O4 Zn2 117.0(7) 3_766 . ? 
Zn1 O4 Zn2 0.8(2) 3_766 . ? 
C9 O2 Zn1 106.3(2) . 3_766 ? 
C9 O2 Zn2 107.2(2) . . ? 
Zn1 O2 Zn2 1.0(2) 3_766 . ? 
C9 O3 Zn1 75.65(18) . 3_766 ? 
O5' O5 S1' 167(6) 3_766 3_766 ? 
O5' O5 S1 171(6) 3_766 3_766 ? 
S1' O5 S1 6.7(7) 3_766 3_766 ? 
O5' O5 Zn2 37(5) 3_766 3_766 ? 
S1' O5 Zn2 130.2(11) 3_766 3_766 ? 
S1 O5 Zn2 133.5(11) 3_766 3_766 ? 
O5' O5 Zn1 38(5) 3_766 . ? 
S1' O5 Zn1 129.9(11) 3_766 . ? 
S1 O5 Zn1 133.2(11) 3_766 . ? 
Zn2 O5 Zn1 0.51(15) 3_766 . ? 
O4 O4' S1' 160(5) 3_766 . ? 
O4 O4' S1 164(6) 3_766 . ? 
S1' O4' S1 7.2(8) . . ? 
O4 O4' Zn1 65(5) 3_766 . ? 
S1' O4' Zn1 131.7(10) . . ? 
S1 O4' Zn1 130.7(10) . . ? 
O4 O4' Zn2 65(5) 3_766 3_766 ? 
S1' O4' Zn2 131.6(10) . 3_766 ? 
S1 O4' Zn2 130.8(10) . 3_766 ? 
Zn1 O4' Zn2 0.7(2) . 3_766 ? 
O5 O5' S1' 10(4) 3_766 . ? 
O5 O5' S1 7(4) 3_766 . ? 
S1' O5' S1 5.1(6) . . ? 
O5 O5' Zn2 135(5) 3_766 . ? 
S1' O5' Zn2 125.8(11) . . ? 
S1 O5' Zn2 128.2(10) . . ? 
O5 O5' Zn1 135(5) 3_766 3_766 ? 
S1' O5' Zn1 125.5(10) . 3_766 ? 
S1 O5' Zn1 127.9(9) . 3_766 ? 
Zn2 O5' Zn1 0.52(17) . 3_766 ? 
S1 O6 S1' 5.6(6) . . ? 
S1 O7' S1' 7.6(8) . . ? 
S1 O7 S1' 6.4(7) . . ? 
S1 O6' S1' 5.3(7) . . ? 
C1 N1 C5 115.9(2) . . ? 
C1 N1 Zn2 122.63(19) . . ? 
C5 N1 Zn2 121.00(19) . . ? 
C1 N1 Zn1 121.9(2) . 3_766 ? 
C5 N1 Zn1 121.7(2) . 3_766 ? 
Zn2 N1 Zn1 0.9(2) . 3_766 ? 
C6 N2 C3 128.2(2) . . ? 
C6 N2 H1A 117(2) . . ? 
C3 N2 H1A 115(2) . . ? 
C1 C2 C3 119.9(2) . . ? 
C1 C2 H2 120.1 . . ? 
C3 C2 H2 120.1 . . ? 
C2 C3 C4 117.6(2) . . ? 
C2 C3 N2 117.6(2) . . ? 
C4 C3 N2 124.8(2) . . ? 
C5 C4 C3 118.7(2) . . ? 
C5 C4 H4 120.6 . . ? 
C3 C4 H4 120.6 . . ? 
N1 C5 C4 124.4(2) . . ? 
N1 C5 H5 117.8 . . ? 
C4 C5 H5 117.8 . . ? 
O1 C6 N2 122.5(3) . . ? 
O1 C6 C7 123.5(3) . . ? 
N2 C6 C7 114.0(2) . . ? 
C6 C7 C8 111.7(2) . . ? 
C6 C7 H7A 109.3 . . ? 
C8 C7 H7A 109.3 . . ? 
C6 C7 H7B 109.3 . . ? 
C8 C7 H7B 109.3 . . ? 
H7A C7 H7B 107.9 . . ? 
C8 C8 C7 112.1(3) 3_677 . ? 
C8 C8 H8A 109.2 3_677 . ? 
C7 C8 H8A 109.2 . . ? 
C8 C8 H8B 109.2 3_677 . ? 
C7 C8 H8B 109.2 . . ? 
H8A C8 H8B 107.9 . . ? 
C12 C10 C11 119.8(2) . . ? 
C12 C10 C9 119.6(2) . . ? 
C11 C10 C9 120.6(2) . . ? 
C10 C12 C13 121.2(3) . . ? 
C10 C12 H12 119.4 . . ? 
C13 C12 H12 119.4 . . ? 
C14 C13 C12 122.7(2) . . ? 
C14 C13 C13 118.8(3) . 3_867 ? 
C12 C13 C13 118.4(3) . 3_867 ? 
C11 C14 C13 121.3(3) 3_867 . ? 
C11 C14 H14 119.3 3_867 . ? 
C13 C14 H14 119.3 . . ? 
C14 C11 C10 120.4(3) 3_867 . ? 
C14 C11 H11 119.8 3_867 . ? 
C10 C11 H11 119.8 . . ? 
O3 C9 O2 122.4(2) . . ? 
O3 C9 C10 119.8(3) . . ? 
O2 C9 C10 117.8(2) . . ? 
O3 C9 Zn1 77.08(18) . 3_766 ? 
O2 C9 Zn1 45.94(15) . 3_766 ? 
C10 C9 Zn1 161.6(2) . 3_766 ? 
N1 C1 C2 123.4(2) . . ? 
N1 C1 H1 118.3 . . ? 
C2 C1 H1 118.3 . . ? 
N3' N3 C16 70.2(12) . . ? 
N3' N3 C15 71.8(12) . . ? 
C16 N3 C15 115.2(3) . . ? 
N3 C15 N3' 34.6(7) . . ? 
N3 C16 N3' 34.9(7) . . ? 
N3 N3' C16 74.9(13) . . ? 
N3 N3' C15 73.6(12) . . ? 
C16 N3' C15 118.5(12) . . ? 
 
_diffrn_measured_fraction_theta_max    0.998 
_diffrn_reflns_theta_full              25.01 
_diffrn_measured_fraction_theta_full   0.998 
_refine_diff_density_max    0.344 
_refine_diff_density_min   -0.242 
_refine_diff_density_rms    0.057 

#===END
 
data_082902 
 
_audit_creation_method            SHELXL-97 
_chemical_name_systematic 
; 
 ? 
; 
_chemical_name_common             ? 
_chemical_melting_point           ? 
_chemical_formula_moiety          ? 
_chemical_formula_sum 
 'C62 H44 Cd2 N12 O14' 
_chemical_formula_weight          1405.89 
 
loop_ 
 _atom_type_symbol 
 _atom_type_description 
 _atom_type_scat_dispersion_real 
 _atom_type_scat_dispersion_imag 
 _atom_type_scat_source 
 'C'  'C'   0.0033   0.0016 
 'International Tables Vol C Tables 4.2.6.8 and 6.1.1.4' 
 'H'  'H'   0.0000   0.0000 
 'International Tables Vol C Tables 4.2.6.8 and 6.1.1.4' 
 'N'  'N'   0.0061   0.0033 
 'International Tables Vol C Tables 4.2.6.8 and 6.1.1.4' 
 'O'  'O'   0.0106   0.0060 
 'International Tables Vol C Tables 4.2.6.8 and 6.1.1.4' 
 'Cd'  'Cd'  -0.8075   1.2024 
 'International Tables Vol C Tables 4.2.6.8 and 6.1.1.4' 
 
_symmetry_cell_setting            Monoclinic  
_symmetry_space_group_name_H-M    C2/c 
 
loop_ 
 _symmetry_equiv_pos_as_xyz 
 'x, y, z' 
 '-x, y, -z+1/2' 
 'x+1/2, y+1/2, z' 
 '-x+1/2, y+1/2, -z+1/2' 
 '-x, -y, -z' 
 'x, -y, z-1/2' 
 '-x+1/2, -y+1/2, -z' 
 'x+1/2, -y+1/2, z-1/2' 
 
_cell_length_a                    20.3856(5) 
_cell_length_b                    13.8293(3) 
_cell_length_c                    13.1563(4) 
_cell_angle_alpha                 90.00 
_cell_angle_beta                  103.632(3) 
_cell_angle_gamma                 90.00 
_cell_volume                      3604.52(16) 
_cell_formula_units_Z             2 
_cell_measurement_temperature     293(2) 
_cell_measurement_reflns_used     4985
_cell_measurement_theta_min       2.2296
_cell_measurement_theta_max       28.8049
 
_exptl_crystal_description        'Prism'  
_exptl_crystal_colour             'colorless' 
_exptl_crystal_size_max           0.22 
_exptl_crystal_size_mid           0.21
_exptl_crystal_size_min           0.12
_exptl_crystal_density_meas       ? 
_exptl_crystal_density_diffrn     1.295 
_exptl_crystal_density_method     'not measured' 
_exptl_crystal_F_000              1416 
_exptl_absorpt_coefficient_mu     0.654 
_exptl_absorpt_correction_type    'Multi-scan'  
_exptl_absorpt_correction_T_min   0.87398 
_exptl_absorpt_correction_T_max   1.00000  
_exptl_absorpt_process_details    'SADABS (Sheldrick, 1996)'
 
_exptl_special_details 
; 
 ? 
; 
 
_diffrn_ambient_temperature       293(2) 
_diffrn_radiation_wavelength      0.71073 
_diffrn_radiation_type            MoK\a 
_diffrn_radiation_source          'fine-focus sealed tube' 
_diffrn_radiation_monochromator   graphite 
_diffrn_measurement_device_type   'Bruker P4' 
_diffrn_measurement_method        '\w scans' 
_diffrn_detector_area_resol_mean  ? 
_diffrn_standards_number          ? 
_diffrn_standards_interval_count  ? 
_diffrn_standards_interval_time   ? 
_diffrn_standards_decay_%         ? 
_diffrn_reflns_number             7532 
_diffrn_reflns_av_R_equivalents   0.0206 
_diffrn_reflns_av_sigmaI/netI     0.0305 
_diffrn_reflns_limit_h_min        -23 
_diffrn_reflns_limit_h_max        24 
_diffrn_reflns_limit_k_min        -16 
_diffrn_reflns_limit_k_max        16 
_diffrn_reflns_limit_l_min        -15 
_diffrn_reflns_limit_l_max        15 
_diffrn_reflns_theta_min          2.23 
_diffrn_reflns_theta_max          25.01 
_reflns_number_total              3188 
_reflns_number_gt                 2277 
_reflns_threshold_expression      >2sigma(I) 
 
_computing_data_collection        'SMART (Siemens, 1996)' 
_computing_cell_refinement        'SAINT (Siemens, 1996)' 
_computing_data_reduction         'SAINT (Siemens, 1996)' 
_computing_structure_solution     'SHELXS97 (Sheldrick, 2008)' 
_computing_structure_refinement   'SHELXL97 (Sheldrick, 2008)' 
_computing_molecular_graphics     'SHELXTL (Sheldrick, 1997)' 
_computing_publication_material   'SHELXTL (Sheldrick, 1997)' 
 
_refine_special_details 
; 
 Refinement of F^2^ against ALL reflections.  The weighted R-factor wR and 
 goodness of fit S are based on F^2^, conventional R-factors R are based 
 on F, with F set to zero for negative F^2^. The threshold expression of 
 F^2^ > 2sigma(F^2^) is used only for calculating R-factors(gt) etc. and is 
 not relevant to the choice of reflections for refinement.  R-factors based 
 on F^2^ are statistically about twice as large as those based on F, and R- 
 factors based on ALL data will be even larger. 
; 
 
_refine_ls_structure_factor_coef  Fsqd  
_refine_ls_matrix_type            full 
_refine_ls_weighting_scheme       calc  
_refine_ls_weighting_details 
 'calc w=1/[\s^2^(Fo^2^)+(0.0961P)^2^+10.1652P] where P=(Fo^2^+2Fc^2^)/3' 
_atom_sites_solution_primary      direct 
_atom_sites_solution_secondary    difmap 
_atom_sites_solution_hydrogens    geom 
_refine_ls_hydrogen_treatment     none
_refine_ls_extinction_method      none 
_refine_ls_extinction_coef        ? 
_refine_ls_number_reflns          3188 
_refine_ls_number_parameters      223 
_refine_ls_number_restraints      0 
_refine_ls_R_factor_all           0.0553 
_refine_ls_R_factor_gt            0.0423 
_refine_ls_wR_factor_ref          0.1850 
_refine_ls_wR_factor_gt           0.1808 
_refine_ls_goodness_of_fit_ref    1.315 
_refine_ls_restrained_S_all       1.315 
_refine_ls_shift/su_max           1.834 
_refine_ls_shift/su_mean          0.060 
 
loop_ 
 _atom_site_label 
 _atom_site_type_symbol 
 _atom_site_fract_x 
 _atom_site_fract_y 
 _atom_site_fract_z 
 _atom_site_U_iso_or_equiv 
 _atom_site_adp_type 
 _atom_site_occupancy 
 _atom_site_symmetry_multiplicity 
 _atom_site_calc_flag 
 _atom_site_refinement_flags 
 _atom_site_disorder_assembly 
 _atom_site_disorder_group 
Cd1 Cd 0.2500 0.2500 0.5000 0.0177(2) Uani 1 2 d S . . 
O2 O 0.2328(2) 0.1587(3) 0.3496(3) 0.0340(11) Uani 1 1 d . . . 
O3 O 0.1489(2) 0.1983(3) 0.2142(3) 0.0359(11) Uani 1 1 d . . . 
C15 C 0.1972(3) 0.1468(5) 0.2585(4) 0.0252(13) Uani 1 1 d . . . 
N3 N 0.2448(3) 0.1016(4) 0.5909(4) 0.0301(12) Uani 1 1 d . . . 
C13 C 0.2153(3) 0.0612(4) 0.1986(4) 0.0239(12) Uani 1 1 d . . . 
C10 C 0.2795(4) 0.0814(5) 0.6885(5) 0.0427(18) Uani 1 1 d . . . 
H10 H 0.3137 0.1233 0.7208 0.051 Uiso 1 1 calc R . . 
C12 C 0.1800(4) 0.0403(5) 0.0985(5) 0.0412(18) Uani 1 1 d . . . 
H12 H 0.1450 0.0804 0.0649 0.049 Uiso 1 1 calc R . . 
N1 N 0.3660(3) 0.2387(4) 0.5035(4) 0.0293(12) Uani 1 1 d . . . 
C14 C 0.2667(4) -0.0018(5) 0.2428(5) 0.0423(19) Uani 1 1 d . . . 
H14 H 0.2928 0.0099 0.3098 0.051 Uiso 1 1 calc R . . 
C8 C 0.7163(3) 0.2953(7) 0.4093(5) 0.0434(18) Uani 1 1 d . . . 
H8 H 0.6938 0.3253 0.3477 0.052 Uiso 1 1 calc R . . 
C5 C 0.4143(3) 0.2496(5) 0.5918(5) 0.0353(16) Uani 1 1 d . . . 
H5 H 0.4011 0.2554 0.6546 0.042 Uiso 1 1 calc R . . 
C9 C 0.7852(3) 0.3030(6) 0.4426(5) 0.0419(18) Uani 1 1 d . . . 
H9 H 0.8089 0.3397 0.4039 0.050 Uiso 1 1 calc R . . 
N2 N 0.5723(3) 0.2467(4) 0.5096(4) 0.0345(13) Uani 1 1 d . . . 
H2 H 0.5975 0.2550 0.5713 0.041 Uiso 1 1 calc R . . 
O1 O 0.5770(3) 0.2317(6) 0.3395(4) 0.085(3) Uani 1 1 d . . . 
C1 C 0.3874(3) 0.2295(5) 0.4151(5) 0.0379(18) Uani 1 1 d . . . 
H1 H 0.3550 0.2206 0.3529 0.045 Uiso 1 1 calc R . . 
C3 C 0.5031(3) 0.2430(4) 0.5025(5) 0.0288(14) Uani 1 1 d . . . 
C2 C 0.4546(3) 0.2326(6) 0.4105(5) 0.0405(19) Uani 1 1 d . . . 
H2A H 0.4667 0.2277 0.3468 0.049 Uiso 1 1 calc R . . 
C7 C 0.6803(3) 0.2428(5) 0.4676(6) 0.0380(17) Uani 1 1 d . . . 
C4 C 0.4814(3) 0.2525(5) 0.5945(5) 0.0372(16) Uani 1 1 d . . . 
H4 H 0.5128 0.2608 0.6579 0.045 Uiso 1 1 calc R . . 
C6 C 0.6051(3) 0.2388(6) 0.4305(6) 0.043(2) Uani 1 1 d . . . 
C11 C 0.1967(4) 0.0407(5) 0.5478(5) 0.0439(18) Uani 1 1 d . . . 
H11 H 0.1725 0.0526 0.4797 0.053 Uiso 1 1 calc R . . 
O4 O 0.5000 0.4764(10) 0.2500 0.070(5) Uani 0.50 2 d SP . . 
C16 C 0.4308(14) 0.463(2) 0.217(3) 0.068(11) Uani 0.25 1 d P . . 
O5 O 0.5788(15) 0.0207(14) 0.561(3) 0.162(19) Uani 0.25 1 d P . . 
C17 C 0.524(2) 0.003(4) 0.460(3) 0.099(14) Uiso 0.25 1 d P . . 
 
loop_ 
 _atom_site_aniso_label 
 _atom_site_aniso_U_11 
 _atom_site_aniso_U_22 
 _atom_site_aniso_U_33 
 _atom_site_aniso_U_23 
 _atom_site_aniso_U_13 
 _atom_site_aniso_U_12 
Cd1 0.0150(3) 0.0199(3) 0.0184(3) -0.0002(2) 0.0044(2) -0.0009(2) 
O2 0.036(2) 0.039(3) 0.024(2) -0.011(2) 0.0015(19) 0.003(2) 
O3 0.039(3) 0.040(3) 0.028(2) -0.006(2) 0.0045(19) 0.014(2) 
C15 0.025(3) 0.028(3) 0.024(3) -0.002(3) 0.009(3) -0.002(3) 
N3 0.037(3) 0.028(3) 0.025(3) 0.005(2) 0.006(2) -0.003(2) 
C13 0.026(3) 0.024(3) 0.022(3) -0.001(2) 0.006(2) 0.000(3) 
C10 0.042(4) 0.041(4) 0.037(4) 0.009(3) -0.006(3) -0.014(3) 
C12 0.049(4) 0.033(4) 0.033(4) -0.009(3) -0.008(3) 0.018(3) 
N1 0.019(2) 0.042(3) 0.028(3) -0.002(2) 0.008(2) -0.001(2) 
C14 0.042(4) 0.049(5) 0.029(4) -0.010(3) -0.005(3) 0.012(4) 
C8 0.023(3) 0.076(5) 0.032(4) 0.011(4) 0.009(3) 0.004(4) 
C5 0.024(3) 0.058(5) 0.025(3) -0.005(3) 0.010(3) -0.004(3) 
C9 0.024(3) 0.067(5) 0.040(4) 0.008(4) 0.017(3) 0.000(4) 
N2 0.016(2) 0.061(4) 0.027(3) -0.004(3) 0.004(2) -0.003(2) 
O1 0.027(3) 0.200(9) 0.029(3) -0.014(3) 0.010(2) -0.012(4) 
C1 0.020(3) 0.068(5) 0.025(3) -0.003(3) 0.003(2) -0.002(3) 
C3 0.018(3) 0.040(4) 0.028(3) 0.001(3) 0.005(2) 0.000(3) 
C2 0.022(3) 0.077(6) 0.024(3) -0.007(3) 0.007(3) -0.001(3) 
C7 0.019(3) 0.067(5) 0.030(3) 0.000(3) 0.009(3) -0.002(3) 
C4 0.023(3) 0.065(5) 0.022(3) -0.005(3) 0.003(2) -0.003(3) 
C6 0.022(3) 0.079(6) 0.030(4) -0.003(4) 0.010(3) -0.003(3) 
C11 0.055(4) 0.040(4) 0.027(3) 0.010(3) -0.009(3) -0.017(4) 
O4 0.037(8) 0.025(7) 0.121(14) 0.000 -0.033(9) 0.000 
C16 0.025(14) 0.038(18) 0.15(3) 0.03(2) 0.031(18) 0.016(14) 
O5 0.12(2) 0.000(10) 0.32(5) 0.048(18) -0.03(3) 0.030(13) 
 
_geom_special_details 
; 
 All esds (except the esd in the dihedral angle between two l.s. planes) 
 are estimated using the full covariance matrix.  The cell esds are taken 
 into account individually in the estimation of esds in distances, angles 
 and torsion angles; correlations between esds in cell parameters are only 
 used when they are defined by crystal symmetry.  An approximate (isotropic) 
 treatment of cell esds is used for estimating esds involving l.s. planes. 
; 
 
loop_ 
 _geom_bond_atom_site_label_1 
 _geom_bond_atom_site_label_2 
 _geom_bond_distance 
 _geom_bond_site_symmetry_2 
 _geom_bond_publ_flag 
Cd1 O2 2.304(4) 7_556 ? 
Cd1 O2 2.304(4) . ? 
Cd1 N1 2.359(5) . ? 
Cd1 N1 2.359(5) 7_556 ? 
Cd1 N3 2.390(5) 7_556 ? 
Cd1 N3 2.390(5) . ? 
O2 C15 1.256(7) . ? 
O3 C15 1.244(7) . ? 
C15 C13 1.516(8) . ? 
N3 C11 1.317(8) . ? 
N3 C10 1.341(8) . ? 
C13 C12 1.375(8) . ? 
C13 C14 1.381(8) . ? 
C10 C14 1.370(9) 6_556 ? 
C10 H10 0.9300 . ? 
C12 C11 1.386(9) 6 ? 
C12 H12 0.9300 . ? 
N1 C1 1.341(8) . ? 
N1 C5 1.342(9) . ? 
C14 C10 1.370(9) 6 ? 
C14 H14 0.9300 . ? 
C8 C9 1.373(9) . ? 
C8 C7 1.385(10) . ? 
C8 H8 0.9300 . ? 
C5 C4 1.362(10) . ? 
C5 H5 0.9300 . ? 
C9 C7 1.379(10) 7_656 ? 
C9 H9 0.9300 . ? 
N2 C6 1.367(9) . ? 
N2 C3 1.393(8) . ? 
N2 H2 0.8600 . ? 
O1 C6 1.203(9) . ? 
C1 C2 1.387(9) . ? 
C1 H1 0.9300 . ? 
C3 C2 1.378(9) . ? 
C3 C4 1.389(9) . ? 
C2 H2A 0.9300 . ? 
C7 C9 1.379(10) 7_656 ? 
C7 C6 1.497(9) . ? 
C4 H4 0.9300 . ? 
C11 C12 1.386(9) 6_556 ? 
C11 H11 0.9300 . ? 
O4 C16 1.39(3) 2_655 ? 
O4 C16 1.39(3) . ? 
O5 C17 1.54(5) . ? 
 
loop_ 
 _geom_angle_atom_site_label_1 
 _geom_angle_atom_site_label_2 
 _geom_angle_atom_site_label_3 
 _geom_angle 
 _geom_angle_site_symmetry_1 
 _geom_angle_site_symmetry_3 
 _geom_angle_publ_flag 
O2 Cd1 O2 180.0 7_556 . ? 
O2 Cd1 N1 94.05(16) 7_556 . ? 
O2 Cd1 N1 85.95(16) . . ? 
O2 Cd1 N1 85.95(16) 7_556 7_556 ? 
O2 Cd1 N1 94.05(16) . 7_556 ? 
N1 Cd1 N1 180.0 . 7_556 ? 
O2 Cd1 N3 86.76(15) 7_556 7_556 ? 
O2 Cd1 N3 93.24(15) . 7_556 ? 
N1 Cd1 N3 84.54(18) . 7_556 ? 
N1 Cd1 N3 95.46(18) 7_556 7_556 ? 
O2 Cd1 N3 93.24(15) 7_556 . ? 
O2 Cd1 N3 86.76(15) . . ? 
N1 Cd1 N3 95.46(18) . . ? 
N1 Cd1 N3 84.54(18) 7_556 . ? 
N3 Cd1 N3 180.00(13) 7_556 . ? 
C15 O2 Cd1 145.8(4) . . ? 
O3 C15 O2 126.1(6) . . ? 
O3 C15 C13 117.8(5) . . ? 
O2 C15 C13 116.1(5) . . ? 
C11 N3 C10 116.7(6) . . ? 
C11 N3 Cd1 116.8(4) . . ? 
C10 N3 Cd1 125.7(4) . . ? 
C12 C13 C14 116.4(6) . . ? 
C12 C13 C15 121.7(5) . . ? 
C14 C13 C15 121.8(5) . . ? 
N3 C10 C14 123.0(6) . 6_556 ? 
N3 C10 H10 118.5 . . ? 
C14 C10 H10 118.5 6_556 . ? 
C13 C12 C11 119.9(6) . 6 ? 
C13 C12 H12 120.0 . . ? 
C11 C12 H12 120.0 6 . ? 
C1 N1 C5 116.0(5) . . ? 
C1 N1 Cd1 121.2(4) . . ? 
C5 N1 Cd1 122.5(4) . . ? 
C10 C14 C13 120.4(6) 6 . ? 
C10 C14 H14 119.8 6 . ? 
C13 C14 H14 119.8 . . ? 
C9 C8 C7 120.0(7) . . ? 
C9 C8 H8 120.0 . . ? 
C7 C8 H8 120.0 . . ? 
N1 C5 C4 123.7(6) . . ? 
N1 C5 H5 118.2 . . ? 
C4 C5 H5 118.2 . . ? 
C8 C9 C7 120.9(7) . 7_656 ? 
C8 C9 H9 119.5 . . ? 
C7 C9 H9 119.6 7_656 . ? 
C6 N2 C3 128.0(6) . . ? 
C6 N2 H2 116.0 . . ? 
C3 N2 H2 116.0 . . ? 
N1 C1 C2 124.2(6) . . ? 
N1 C1 H1 117.9 . . ? 
C2 C1 H1 117.9 . . ? 
C2 C3 C4 117.8(6) . . ? 
C2 C3 N2 124.6(6) . . ? 
C4 C3 N2 117.6(6) . . ? 
C3 C2 C1 118.4(6) . . ? 
C3 C2 H2A 120.8 . . ? 
C1 C2 H2A 120.8 . . ? 
C9 C7 C8 119.1(6) 7_656 . ? 
C9 C7 C6 122.6(6) 7_656 . ? 
C8 C7 C6 118.4(6) . . ? 
C5 C4 C3 119.9(6) . . ? 
C5 C4 H4 120.1 . . ? 
C3 C4 H4 120.1 . . ? 
O1 C6 N2 124.1(6) . . ? 
O1 C6 C7 122.5(6) . . ? 
N2 C6 C7 113.3(6) . . ? 
N3 C11 C12 123.5(6) . 6_556 ? 
N3 C11 H11 118.2 . . ? 
C12 C11 H11 118.2 6_556 . ? 
C16 O4 C16 165(3) 2_655 . ? 
 
_diffrn_measured_fraction_theta_max    0.999 
_diffrn_reflns_theta_full              25.01 
_diffrn_measured_fraction_theta_full   0.999 
_refine_diff_density_max    1.257 
_refine_diff_density_min   -0.468 
_refine_diff_density_rms    0.191 

#===END
 
data_0629 
 
_audit_creation_method            SHELXL-97 
_chemical_name_systematic 
; 
 ? 
; 
_chemical_name_common             ? 
_chemical_melting_point           ? 
_chemical_formula_moiety          ? 
_chemical_formula_sum 
 'C26 H18 N4 O6 Zn' 
_chemical_formula_weight          547.81 
 
loop_ 
 _atom_type_symbol 
 _atom_type_description 
 _atom_type_scat_dispersion_real 
 _atom_type_scat_dispersion_imag 
 _atom_type_scat_source 
 'C'  'C'   0.0033   0.0016 
 'International Tables Vol C Tables 4.2.6.8 and 6.1.1.4' 
 'H'  'H'   0.0000   0.0000 
 'International Tables Vol C Tables 4.2.6.8 and 6.1.1.4' 
 'N'  'N'   0.0061   0.0033 
 'International Tables Vol C Tables 4.2.6.8 and 6.1.1.4' 
 'O'  'O'   0.0106   0.0060 
 'International Tables Vol C Tables 4.2.6.8 and 6.1.1.4' 
 'Zn'  'Zn'   0.2839   1.4301 
 'International Tables Vol C Tables 4.2.6.8 and 6.1.1.4' 
 
_symmetry_cell_setting            Monoclinic 
_symmetry_space_group_name_H-M    P2(1)/n 
 
loop_ 
 _symmetry_equiv_pos_as_xyz 
 'x, y, z' 
 '-x+1/2, y+1/2, -z+1/2' 
 '-x, -y, -z' 
 'x-1/2, -y-1/2, z-1/2' 
 
_cell_length_a                    9.5894(3) 
_cell_length_b                    18.8609(4) 
_cell_length_c                    13.2876(4) 
_cell_angle_alpha                 90.00 
_cell_angle_beta                  106.102(3) 
_cell_angle_gamma                 90.00 
_cell_volume                      2308.98(11) 
_cell_formula_units_Z             4 
_cell_measurement_temperature     293(2) 
_cell_measurement_reflns_used     5220 
_cell_measurement_theta_min       2.3353 
_cell_measurement_theta_max       28.8179
 
_exptl_crystal_description        'Prism' 
_exptl_crystal_colour             Colorless 
_exptl_crystal_size_max           0.4500 
_exptl_crystal_size_mid           0.3000 
_exptl_crystal_size_min           0.2500 
_exptl_crystal_density_meas       ? 
_exptl_crystal_density_diffrn     1.576 
_exptl_crystal_density_method     'not measured' 
_exptl_crystal_F_000              1120 
_exptl_absorpt_coefficient_mu     1.116 
_exptl_absorpt_correction_type    'multi-scan'
_exptl_absorpt_correction_T_min   0.82135
_exptl_absorpt_correction_T_max   1.00000
_exptl_absorpt_process_details    'SADABS (Sheldrick, 1996)' 
 
_exptl_special_details 
; 
 ? 
; 
 
_diffrn_ambient_temperature       293(2) 
_diffrn_radiation_wavelength      0.71073 
_diffrn_radiation_type            MoK\a 
_diffrn_radiation_source          'fine-focus sealed tube' 
_diffrn_radiation_monochromator   graphite 
_diffrn_measurement_device_type   'Bruker P4' 
_diffrn_measurement_method        '\w scans'  
_diffrn_detector_area_resol_mean  ? 
_diffrn_standards_number          ? 
_diffrn_standards_interval_count  ? 
_diffrn_standards_interval_time   ? 
_diffrn_standards_decay_%         ? 
_diffrn_reflns_number             9065 
_diffrn_reflns_av_R_equivalents   0.0254 
_diffrn_reflns_av_sigmaI/netI     0.0408 
_diffrn_reflns_limit_h_min        -11 
_diffrn_reflns_limit_h_max        10 
_diffrn_reflns_limit_k_min        -22 
_diffrn_reflns_limit_k_max        22 
_diffrn_reflns_limit_l_min        -15 
_diffrn_reflns_limit_l_max        12 
_diffrn_reflns_theta_min          2.34 
_diffrn_reflns_theta_max          25.01 
_reflns_number_total              4067 
_reflns_number_gt                 3081 
_reflns_threshold_expression      >2sigma(I) 
 
_computing_data_collection        'SMART (Siemens, 1996)' 
_computing_cell_refinement        'SAINT (Siemens, 1996)' 
_computing_data_reduction         'SAINT (Siemens, 1996)' 
_computing_structure_solution     'SHELXS97 (Sheldrick, 2008)' 
_computing_structure_refinement   'SHELXL97 (Sheldrick, 2008)' 
_computing_molecular_graphics     'SHELXTL (Sheldrick, 1997)' 
_computing_publication_material   'SHELXTL (Sheldrick, 1997)' 
 
_refine_special_details 
; 
 Refinement of F^2^ against ALL reflections.  The weighted R-factor wR and 
 goodness of fit S are based on F^2^, conventional R-factors R are based 
 on F, with F set to zero for negative F^2^. The threshold expression of 
 F^2^ > 2sigma(F^2^) is used only for calculating R-factors(gt) etc. and is 
 not relevant to the choice of reflections for refinement.  R-factors based 
 on F^2^ are statistically about twice as large as those based on F, and R- 
 factors based on ALL data will be even larger. 
; 
 
_refine_ls_structure_factor_coef  Fsqd  
_refine_ls_matrix_type            full 
_refine_ls_weighting_scheme       calc  
_refine_ls_weighting_details 
 'calc w=1/[\s^2^(Fo^2^)+(0.0568P)^2^+0.0000P] where P=(Fo^2^+2Fc^2^)/3' 
_atom_sites_solution_primary      direct 
_atom_sites_solution_secondary    difmap 
_atom_sites_solution_hydrogens    geom 
_refine_ls_hydrogen_treatment     none
_refine_ls_extinction_method      none 
_refine_ls_extinction_coef        ? 
_refine_ls_number_reflns          4067 
_refine_ls_number_parameters      334 
_refine_ls_number_restraints      0 
_refine_ls_R_factor_all           0.0504 
_refine_ls_R_factor_gt            0.0333 
_refine_ls_wR_factor_ref          0.0911 
_refine_ls_wR_factor_gt           0.0869 
_refine_ls_goodness_of_fit_ref    1.000 
_refine_ls_restrained_S_all       1.000 
_refine_ls_shift/su_max           0.068 
_refine_ls_shift/su_mean          0.004 
 
loop_ 
 _atom_site_label 
 _atom_site_type_symbol 
 _atom_site_fract_x 
 _atom_site_fract_y 
 _atom_site_fract_z 
 _atom_site_U_iso_or_equiv 
 _atom_site_adp_type 
 _atom_site_occupancy 
 _atom_site_symmetry_multiplicity 
 _atom_site_calc_flag 
 _atom_site_refinement_flags 
 _atom_site_disorder_assembly 
 _atom_site_disorder_group 
Zn1 Zn 0.10560(3) 1.097787(16) 0.82993(2) 0.02350(12) Uani 1 1 d . . . 
N1 N 0.2489(2) 1.01485(12) 0.86891(17) 0.0267(5) Uani 1 1 d . . . 
O5 O 0.1592(2) 1.15525(11) 0.72279(16) 0.0409(5) Uani 1 1 d . . . 
O3 O -0.0055(2) 1.14747(12) 0.90920(16) 0.0435(6) Uani 1 1 d . . . 
N2 N 0.5250(2) 0.83819(12) 0.90762(16) 0.0266(5) Uani 1 1 d . . . 
H2 H 0.5525 0.8220 0.9705 0.032 Uiso 1 1 calc R . . 
O1 O 0.5414(2) 0.82179(11) 0.74216(15) 0.0383(5) Uani 1 1 d . . . 
C13 C 1.0288(3) 0.59332(15) 0.9591(2) 0.0293(6) Uani 1 1 d . . . 
N4 N -0.0631(2) 1.04210(12) 0.72795(17) 0.0281(5) Uani 1 1 d . . . 
C3 C 0.4328(3) 0.89668(14) 0.8909(2) 0.0254(6) Uani 1 1 d . . . 
O2 O 1.0652(2) 0.55859(12) 0.89367(15) 0.0431(6) Uani 1 1 d . . . 
N3 N 1.0997(2) 0.58999(12) 1.06325(18) 0.0324(6) Uani 1 1 d . . . 
H3 H 1.0714 0.6194 1.1029 0.039 Uiso 1 1 calc R . . 
C22 C 0.3322(3) 1.23689(14) 0.6963(2) 0.0261(6) Uani 1 1 d . . . 
C16 C 0.0316(3) 1.13660(16) 1.0058(2) 0.0339(7) Uani 1 1 d . . . 
C23 C 0.2781(3) 1.18729(15) 0.7653(2) 0.0310(7) Uani 1 1 d . . . 
C7 C 0.6811(3) 0.74428(14) 0.8717(2) 0.0234(6) Uani 1 1 d . . . 
C6 C 0.5763(3) 0.80382(14) 0.8346(2) 0.0257(6) Uani 1 1 d . . . 
C4 C 0.3857(3) 0.92232(15) 0.9734(2) 0.0304(7) Uani 1 1 d . . . 
H4 H 0.4156 0.9004 1.0385 0.036 Uiso 1 1 calc R . . 
O4 O 0.1344(3) 1.09768(15) 1.0486(2) 0.0814(10) Uani 1 1 d . . . 
C9 C 0.8434(3) 0.66066(14) 0.8268(2) 0.0284(6) Uani 1 1 d . . . 
H9 H 0.8778 0.6385 0.7759 0.034 Uiso 1 1 calc R . . 
C18 C -0.0458(3) 1.17801(15) 1.0710(2) 0.0284(6) Uani 1 1 d . . . 
C10 C 0.9027(3) 0.64366(14) 0.9313(2) 0.0257(6) Uani 1 1 d . . . 
C15 C 1.3022(3) 0.50797(17) 1.0642(2) 0.0384(8) Uani 1 1 d . . . 
H15 H 1.2887 0.5119 0.9924 0.046 Uiso 1 1 calc R . . 
C25 C -0.2607(3) 0.96434(16) 0.7205(2) 0.0355(7) Uani 1 1 d . . . 
H25 H -0.3186 0.9414 0.7560 0.043 Uiso 1 1 calc R . . 
C8 C 0.7341(3) 0.70995(15) 0.7975(2) 0.0309(7) Uani 1 1 d . . . 
H8 H 0.6950 0.7205 0.7269 0.037 Uiso 1 1 calc R . . 
C12 C 0.7332(3) 0.72386(16) 0.9747(2) 0.0360(7) Uani 1 1 d . . . 
H12 H 0.6940 0.7437 1.0249 0.043 Uiso 1 1 calc R . . 
C5 C 0.2952(3) 0.97994(15) 0.9595(2) 0.0304(7) Uani 1 1 d . . . 
H5 H 0.2644 0.9955 1.0162 0.036 Uiso 1 1 calc R . . 
C19 C -0.1572(3) 1.22469(15) 1.0261(2) 0.0325(7) Uani 1 1 d . . . 
H19 H -0.1914 1.2279 0.9535 0.039 Uiso 1 1 calc R . . 
C24 C -0.1485(3) 1.00723(16) 0.7742(2) 0.0347(7) Uani 1 1 d . . . 
H24 H -0.1318 1.0120 0.8463 0.042 Uiso 1 1 calc R . . 
C2 C 0.3875(4) 0.93429(18) 0.7974(2) 0.0456(9) Uani 1 1 d . . . 
H2A H 0.4182 0.9206 0.7398 0.055 Uiso 1 1 calc R . . 
C14 C 1.2128(3) 0.54454(15) 1.1134(2) 0.0288(6) Uani 1 1 d . . . 
C1 C 0.2978(4) 0.99129(18) 0.7906(2) 0.0459(9) Uani 1 1 d . . . 
H1 H 0.2689 1.0153 0.7270 0.055 Uiso 1 1 calc R . . 
C11 C 0.8429(3) 0.67437(17) 1.0045(2) 0.0388(8) Uani 1 1 d . . . 
H11 H 0.8771 0.6615 1.0746 0.047 Uiso 1 1 calc R . . 
C20 C 0.2821(3) 1.23340(15) 0.5881(2) 0.0317(7) Uani 1 1 d . . . 
H20 H 0.2068 1.2026 0.5569 0.038 Uiso 1 1 calc R . . 
C21 C 0.4392(3) 1.28529(17) 0.7409(2) 0.0402(8) Uani 1 1 d . . . 
H21 H 0.4714 1.2894 0.8134 0.048 Uiso 1 1 calc R . . 
C26 C -0.0891(3) 1.03415(16) 0.6246(2) 0.0368(7) Uani 1 1 d . . . 
H26 H -0.0302 1.0585 0.5913 0.044 Uiso 1 1 calc R . . 
C17 C -0.0011(4) 1.17241(17) 1.1792(2) 0.0427(8) Uani 1 1 d . . . 
H17 H 0.0702 1.1396 1.2106 0.051 Uiso 1 1 calc R . . 
O6 O 0.3486(2) 1.17854(11) 0.85787(15) 0.0438(6) Uani 1 1 d . . . 
 
loop_ 
 _atom_site_aniso_label 
 _atom_site_aniso_U_11 
 _atom_site_aniso_U_22 
 _atom_site_aniso_U_33 
 _atom_site_aniso_U_23 
 _atom_site_aniso_U_13 
 _atom_site_aniso_U_12 
Zn1 0.02380(17) 0.02422(18) 0.02410(19) -0.00100(13) 0.00932(13) -0.00028(15) 
N1 0.0277(12) 0.0304(13) 0.0236(13) 0.0013(10) 0.0097(10) 0.0040(11) 
O5 0.0370(12) 0.0420(13) 0.0487(14) 0.0116(10) 0.0202(10) -0.0047(11) 
O3 0.0440(13) 0.0582(15) 0.0297(13) -0.0104(10) 0.0125(10) 0.0146(11) 
N2 0.0278(12) 0.0307(13) 0.0206(12) 0.0045(10) 0.0055(10) 0.0102(11) 
O1 0.0504(13) 0.0405(12) 0.0219(12) 0.0055(9) 0.0065(9) 0.0167(11) 
C13 0.0246(14) 0.0279(16) 0.0328(17) -0.0019(13) 0.0039(12) -0.0005(13) 
N4 0.0268(12) 0.0279(13) 0.0298(14) -0.0014(10) 0.0083(10) -0.0022(11) 
C3 0.0224(14) 0.0264(15) 0.0272(15) 0.0010(12) 0.0064(11) 0.0003(13) 
O2 0.0415(13) 0.0514(14) 0.0342(13) -0.0086(10) 0.0066(10) 0.0186(11) 
N3 0.0321(13) 0.0329(14) 0.0297(14) -0.0010(10) 0.0044(11) 0.0146(11) 
C22 0.0292(15) 0.0253(15) 0.0282(16) 0.0031(12) 0.0154(12) 0.0013(13) 
C16 0.0399(18) 0.0327(17) 0.0348(19) -0.0031(13) 0.0201(14) -0.0005(15) 
C23 0.0389(17) 0.0276(16) 0.0339(19) 0.0022(12) 0.0223(14) 0.0039(14) 
C7 0.0218(14) 0.0257(15) 0.0209(15) -0.0011(11) 0.0029(11) 0.0002(12) 
C6 0.0237(15) 0.0256(15) 0.0263(16) -0.0017(11) 0.0044(12) -0.0017(12) 
C4 0.0347(16) 0.0332(17) 0.0246(16) 0.0084(12) 0.0106(13) 0.0058(13) 
O4 0.118(3) 0.087(2) 0.0526(17) 0.0197(14) 0.0452(17) 0.0719(19) 
C9 0.0313(15) 0.0290(16) 0.0251(16) -0.0060(12) 0.0080(12) 0.0054(13) 
C18 0.0353(16) 0.0260(15) 0.0287(16) -0.0035(12) 0.0167(13) -0.0026(13) 
C10 0.0236(14) 0.0241(15) 0.0271(16) -0.0024(11) 0.0029(12) 0.0002(12) 
C15 0.0380(17) 0.049(2) 0.0292(17) 0.0054(14) 0.0117(13) 0.0125(16) 
C25 0.0362(16) 0.0376(18) 0.0331(18) 0.0035(13) 0.0103(13) -0.0113(14) 
C8 0.0363(16) 0.0350(17) 0.0180(15) -0.0006(12) 0.0018(12) 0.0049(14) 
C12 0.0400(17) 0.0443(19) 0.0252(17) 0.0001(13) 0.0116(13) 0.0164(15) 
C5 0.0359(16) 0.0332(16) 0.0265(16) -0.0014(12) 0.0161(13) 0.0032(14) 
C19 0.0347(16) 0.0417(18) 0.0213(16) -0.0069(13) 0.0081(13) 0.0015(15) 
C24 0.0401(18) 0.0386(18) 0.0252(17) 0.0006(13) 0.0089(13) -0.0091(15) 
C2 0.057(2) 0.053(2) 0.0295(18) 0.0074(15) 0.0180(15) 0.0300(19) 
C14 0.0281(15) 0.0270(15) 0.0288(17) 0.0002(12) 0.0037(12) 0.0003(13) 
C1 0.056(2) 0.054(2) 0.0308(19) 0.0147(15) 0.0179(16) 0.0314(18) 
C11 0.0422(18) 0.052(2) 0.0183(16) 0.0036(14) 0.0017(13) 0.0202(16) 
C20 0.0303(16) 0.0312(16) 0.0349(18) 0.0021(13) 0.0112(13) -0.0051(13) 
C21 0.054(2) 0.048(2) 0.0228(17) 0.0004(14) 0.0171(15) -0.0114(17) 
C26 0.0322(16) 0.0472(19) 0.0346(18) -0.0012(14) 0.0153(13) -0.0109(15) 
C17 0.053(2) 0.0436(19) 0.0342(19) 0.0076(14) 0.0160(15) 0.0205(17) 
O6 0.0694(16) 0.0399(13) 0.0252(13) 0.0038(9) 0.0185(11) -0.0022(12) 
 
_geom_special_details 
; 
 All esds (except the esd in the dihedral angle between two l.s. planes) 
 are estimated using the full covariance matrix.  The cell esds are taken 
 into account individually in the estimation of esds in distances, angles 
 and torsion angles; correlations between esds in cell parameters are only 
 used when they are defined by crystal symmetry.  An approximate (isotropic) 
 treatment of cell esds is used for estimating esds involving l.s. planes. 
; 
 
loop_ 
 _geom_bond_atom_site_label_1 
 _geom_bond_atom_site_label_2 
 _geom_bond_distance 
 _geom_bond_site_symmetry_2 
 _geom_bond_publ_flag 
Zn1 O3 1.9350(19) . ? 
Zn1 O5 1.967(2) . ? 
Zn1 N1 2.051(2) . ? 
Zn1 N4 2.084(2) . ? 
N1 C1 1.331(4) . ? 
N1 C5 1.335(3) . ? 
O5 C23 1.276(3) . ? 
O3 C16 1.250(3) . ? 
N2 C6 1.367(3) . ? 
N2 C3 1.393(3) . ? 
N2 H2 0.8600 . ? 
O1 C6 1.228(3) . ? 
C13 O2 1.215(3) . ? 
C13 N3 1.364(3) . ? 
C13 C10 1.500(4) . ? 
N4 C26 1.334(4) . ? 
N4 C24 1.327(3) . ? 
C3 C4 1.384(4) . ? 
C3 C2 1.391(4) . ? 
N3 C14 1.398(3) . ? 
N3 H3 0.8600 . ? 
C22 C21 1.378(4) . ? 
C22 C20 1.385(4) . ? 
C22 C23 1.501(4) . ? 
C16 O4 1.234(4) . ? 
C16 C18 1.506(4) . ? 
C23 O6 1.239(3) . ? 
C7 C12 1.376(4) . ? 
C7 C8 1.388(4) . ? 
C7 C6 1.497(4) . ? 
C4 C5 1.371(4) . ? 
C4 H4 0.9300 . ? 
C9 C8 1.374(4) . ? 
C9 C10 1.385(4) . ? 
C9 H9 0.9300 . ? 
C18 C19 1.385(4) . ? 
C18 C17 1.386(4) . ? 
C10 C11 1.386(4) . ? 
C15 C26 1.377(4) 4_776 ? 
C15 C14 1.396(4) . ? 
C15 H15 0.9300 . ? 
C25 C24 1.377(4) . ? 
C25 C14 1.384(4) 4_475 ? 
C25 H25 0.9300 . ? 
C8 H8 0.9300 . ? 
C12 C11 1.379(4) . ? 
C12 H12 0.9300 . ? 
C5 H5 0.9300 . ? 
C19 C20 1.382(4) 4_586 ? 
C19 H19 0.9300 . ? 
C24 H24 0.9300 . ? 
C2 C1 1.364(4) . ? 
C2 H2A 0.9300 . ? 
C14 C25 1.384(4) 4_776 ? 
C1 H1 0.9300 . ? 
C11 H11 0.9300 . ? 
C20 C19 1.382(4) 4_685 ? 
C20 H20 0.9300 . ? 
C21 C17 1.377(4) 4_685 ? 
C21 H21 0.9300 . ? 
C26 C15 1.377(4) 4_475 ? 
C26 H26 0.9300 . ? 
C17 C21 1.377(4) 4_586 ? 
C17 H17 0.9300 . ? 
 
loop_ 
 _geom_angle_atom_site_label_1 
 _geom_angle_atom_site_label_2 
 _geom_angle_atom_site_label_3 
 _geom_angle 
 _geom_angle_site_symmetry_1 
 _geom_angle_site_symmetry_3 
 _geom_angle_publ_flag 
O3 Zn1 O5 114.88(9) . . ? 
O3 Zn1 N1 131.53(9) . . ? 
O5 Zn1 N1 108.17(9) . . ? 
O3 Zn1 N4 98.78(9) . . ? 
O5 Zn1 N4 96.80(9) . . ? 
N1 Zn1 N4 97.16(9) . . ? 
C1 N1 C5 116.0(2) . . ? 
C1 N1 Zn1 114.44(19) . . ? 
C5 N1 Zn1 129.49(19) . . ? 
C23 O5 Zn1 108.71(18) . . ? 
C16 O3 Zn1 115.88(19) . . ? 
C6 N2 C3 126.9(2) . . ? 
C6 N2 H2 116.6 . . ? 
C3 N2 H2 116.6 . . ? 
O2 C13 N3 122.7(3) . . ? 
O2 C13 C10 122.5(3) . . ? 
N3 C13 C10 114.8(2) . . ? 
C26 N4 C24 117.3(2) . . ? 
C26 N4 Zn1 128.00(19) . . ? 
C24 N4 Zn1 114.59(18) . . ? 
C4 C3 C2 116.1(3) . . ? 
C4 C3 N2 118.8(2) . . ? 
C2 C3 N2 125.0(2) . . ? 
C13 N3 C14 127.9(2) . . ? 
C13 N3 H3 116.0 . . ? 
C14 N3 H3 116.0 . . ? 
C21 C22 C20 118.7(2) . . ? 
C21 C22 C23 119.5(2) . . ? 
C20 C22 C23 121.7(2) . . ? 
O4 C16 O3 122.3(3) . . ? 
O4 C16 C18 120.1(3) . . ? 
O3 C16 C18 117.4(3) . . ? 
O6 C23 O5 123.5(3) . . ? 
O6 C23 C22 120.3(3) . . ? 
O5 C23 C22 116.3(3) . . ? 
C12 C7 C8 118.2(2) . . ? 
C12 C7 C6 124.2(2) . . ? 
C8 C7 C6 117.4(2) . . ? 
O1 C6 N2 121.8(2) . . ? 
O1 C6 C7 120.5(2) . . ? 
N2 C6 C7 117.6(2) . . ? 
C5 C4 C3 120.3(3) . . ? 
C5 C4 H4 119.9 . . ? 
C3 C4 H4 119.9 . . ? 
C8 C9 C10 120.6(2) . . ? 
C8 C9 H9 119.7 . . ? 
C10 C9 H9 119.7 . . ? 
C19 C18 C17 118.4(3) . . ? 
C19 C18 C16 121.7(2) . . ? 
C17 C18 C16 119.8(3) . . ? 
C9 C10 C11 118.2(2) . . ? 
C9 C10 C13 118.2(2) . . ? 
C11 C10 C13 123.6(2) . . ? 
C26 C15 C14 118.4(3) 4_776 . ? 
C26 C15 H15 120.8 4_776 . ? 
C14 C15 H15 120.8 . . ? 
C24 C25 C14 119.9(3) . 4_475 ? 
C24 C25 H25 120.1 . . ? 
C14 C25 H25 120.1 4_475 . ? 
C9 C8 C7 121.0(2) . . ? 
C9 C8 H8 119.5 . . ? 
C7 C8 H8 119.5 . . ? 
C7 C12 C11 120.8(3) . . ? 
C7 C12 H12 119.6 . . ? 
C11 C12 H12 119.6 . . ? 
N1 C5 C4 123.5(3) . . ? 
N1 C5 H5 118.2 . . ? 
C4 C5 H5 118.2 . . ? 
C20 C19 C18 120.6(3) 4_586 . ? 
C20 C19 H19 119.7 4_586 . ? 
C18 C19 H19 119.7 . . ? 
N4 C24 C25 123.0(3) . . ? 
N4 C24 H24 118.5 . . ? 
C25 C24 H24 118.5 . . ? 
C1 C2 C3 119.8(3) . . ? 
C1 C2 H2A 120.1 . . ? 
C3 C2 H2A 120.1 . . ? 
C25 C14 N3 117.4(3) 4_776 . ? 
C25 C14 C15 117.4(3) 4_776 . ? 
N3 C14 C15 125.2(3) . . ? 
N1 C1 C2 124.3(3) . . ? 
N1 C1 H1 117.9 . . ? 
C2 C1 H1 117.9 . . ? 
C12 C11 C10 120.8(3) . . ? 
C12 C11 H11 119.6 . . ? 
C10 C11 H11 119.6 . . ? 
C19 C20 C22 120.6(3) 4_685 . ? 
C19 C20 H20 119.7 4_685 . ? 
C22 C20 H20 119.7 . . ? 
C17 C21 C22 120.7(3) 4_685 . ? 
C17 C21 H21 119.7 4_685 . ? 
C22 C21 H21 119.7 . . ? 
N4 C26 C15 124.0(3) . 4_475 ? 
N4 C26 H26 118.0 . . ? 
C15 C26 H26 118.0 4_475 . ? 
C21 C17 C18 120.9(3) 4_586 . ? 
C21 C17 H17 119.5 4_586 . ? 
C18 C17 H17 119.5 . . ? 
 
_diffrn_measured_fraction_theta_max    0.999 
_diffrn_reflns_theta_full              25.01 
_diffrn_measured_fraction_theta_full   0.999 
_refine_diff_density_max    0.708 
_refine_diff_density_min   -0.667 
_refine_diff_density_rms    0.062 

#===END
